# Supplementary material for: Non-ideal stoichiometry and thermochemistry of aqueous iridium oxide nanoparticles in proton-coupled electron transfer and oxygen-atom transfer
Source: Royal Society of Chemistry journal article supplement (doi:10.1039/d6sc00492j), 2026-04-11
Supplement: d6sc00492j1.pdf [file d6sc00492j1.pdf]

## Supporting Information

# Non-Ideal Stoichiometry and Thermochemistry of Aqueous Iridium Oxide Nanoparticles in Proton-Coupled Electron Transfer and Oxygen-Atom Transfer

Justin L. Lee, Saeed Saeed, James M. Mayer\*

james.mayer@yale.edu

Department of Chemistry, Yale University, New Haven, Connecticut 06520-8107, United States

### Table of Contents

|                                                                                                                      |    |
|----------------------------------------------------------------------------------------------------------------------|----|
| Section S1: General considerations .....                                                                             | 1  |
| S1.1 Reagents.....                                                                                                   | 1  |
| S1.2 Instrumentation.....                                                                                            | 2  |
| Section S2: IrO <sub>x</sub> synthesis & characterization.....                                                       | 2  |
| Section S3: Electrochemical measurements of the IrO <sub>x</sub> NPs.....                                            | 5  |
| Section S4: UV-vis and <sup>1</sup> H NMR titrations.....                                                            | 6  |
| Section S5: Experimental details for UV-vis spectroelectrochemistry.....                                             | 11 |
| Section S6: OAT reactivity.....                                                                                      | 13 |
| Section S7: Bond dissociation enthalpies (BDEs) and bond dissociation free energies (BDFEs) for Y–O substrates ..... | 22 |
| Section S8: References.....                                                                                          | 26 |

### Section S1: General considerations

#### S1.1 Reagents

18 MΩ cm water (H<sub>2</sub>O) from a Synergy<sup>®</sup> Milli-Q system was used in all studies. H<sub>2</sub>O and D<sub>2</sub>O (Sigma-Aldrich, 99.9% enrichment) were sparged with nitrogen gas for > 1 min/mL to remove ambient air and transported into a nitrogen-filled glovebox prior to use. All reagents were used as received unless otherwise stated. K<sub>2</sub>IrCl<sub>6</sub> (99.99% trace metals) was purchased from Sigma-Aldrich. Proton-coupled electron transfer (PCET) reagents 1,4-hydroquinone (H<sub>2</sub>Q, ReagentPlus, >99.5%), *p*-benzoquinone (Q, reagent grade, >98%), and (+)-sodium L-ascorbate (NaAscH, 99%+) were purchased from Sigma-Aldrich. Potassium hydrogen monopersulfate (oxone) was purchased from EMD Millipore Corporation. Oxygen atom transfer reagents NaNO<sub>2</sub> (ACS reagent), bis(*p*-sulfonatophenyl)phenylphosphine dihydrate dipotassium salt (PAr<sub>3</sub>, 97%), and pyridine (Py, 99.8%) were purchased from Sigma-Aldrich. Isotope experiments used D<sub>2</sub>O (Sigma-Aldrich, 99.9% enrichment), Na<sup>15</sup>NO<sub>2</sub> (ICON Isotopes, 99% enrichment) and Na<sup>15</sup>NO<sub>3</sub> (Sigma-Aldrich, >98% enrichment).

## S1.2 Instrumentation

Transmission electron microscopy images of the nanoparticles (NPs) were measured with a FEI Tecnai Osiris 200 kV TEM. As-prepared IrO<sub>x</sub> NPs (~1.7 mM [Ir]) was deposited onto the same type of grid. All UV-vis spectra were collected using a Cary 5000 spectrophotometer with a scanning monochromator inside a nitrogen-filled glovebox (equipped with Ocean Optics fiber optics cables). pH measurements were collected using a Thermo Scientific™ Orion™ PerpHecT™ ROSS™ Combination pH Micro Electrode inside the glove box (other than during NP syntheses), calibrated using five NIST pH standard solutions in H<sub>2</sub>O from BrandNu: 1.68, 4.01, 7.00, 10.01, 12.46. Inductively coupled plasma mass spectrometry was performed on a Perkin-Elmer ICP-MS Elan DRC-e. <sup>1</sup>H, <sup>15</sup>N, and <sup>31</sup>P NMR spectra were collected on an Agilent DD2 400 MHz and 500 MHz NMR spectrometers at room temperature. (CH<sub>3</sub>)<sub>2</sub>SO<sub>2</sub> (δ 3.14 ppm) or *tert*-butyl alcohol (δ 1.24) was used as the internal <sup>1</sup>H standard. Cyclic voltammetry was performed on a CH Instruments model 650D Potentiostat in a nitrogen-filled glovebox, using a standard 3-electrode setup. A 3 mm-diameter boron-doped diamond (BDD) working electrode, a platinum wire counter electrode, and an Ag/AgCl reference electrode (BASi Research Products) were used. The UV-vis spectroelectrochemistry setup is detailed in Section S5. All voltammograms were converted from the Ag/AgCl reference to NHE (+0.21 V) as an internal standard. All measurements are at room temperature. pH adjustments were done *via* simple dilution with 18 MΩ H<sub>2</sub>O, or with diluted (~100 mM) HNO<sub>3</sub> or NaOH.

Section S2: IrO<sub>x</sub> synthesis & characterization

IrO<sub>x</sub> NPs were prepared following a previously reported procedure.<sup>1</sup> 0.0971 g K<sub>2</sub>IrCl<sub>6</sub> was dissolved in 100 mL 18 MΩ cm H<sub>2</sub>O to give an orange-brown solution, and 8.000 mL 10% w/w NaOH (aq, 0.0200 mol NaOH) was added to increase the pH to 13.0. The reaction mixture was heated at 90 °C for 20 minutes to produce a pale blue color, and then cooled in an ice bath. 8.500 mL 3 M HNO<sub>3</sub> (aq, 0.0255 mol HNO<sub>3</sub>) was added to the mixture to produce a dark purple color (Figure S1) and decrease the pH to 1.45, and the reaction mixture was allowed to stir at 0 °C for 80 minutes. The colloidal solution was degassed for ~2.5 hours under a stream of nitrogen gas then transported into the glovebox for storage and all measurements. The solution pH of the as-prepared IrO<sub>x</sub> NPs was ~1.65.

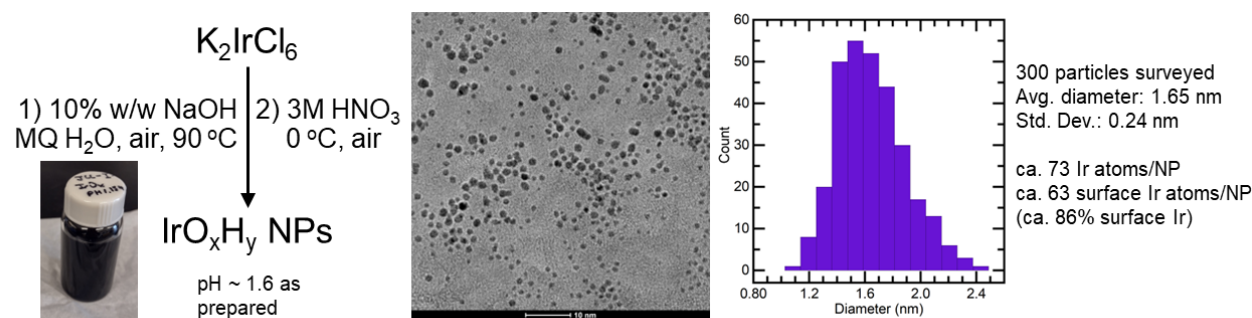

**Figure S1.** Basifying then acid hydrolysis of K<sub>2</sub>IrCl<sub>6</sub> produced a dark purple colloidal suspension of IrO<sub>x</sub> NPs. TEM images of the IrO<sub>x</sub> NPs illustrated the spherical shape of the NPs, with an average diameter of 1.7±0.2 nm. The scale bar is 10 nm. Reproduced from Lee, J. L.; Gentry, N. E.; Peper, J. L.; Hetzel, S.; Quist, C.; Menges, F. S.; Mayer, J. M. *ACS Nano* **2025**, *19*, 10289–10300. Copyright 2025 American Chemical Society.<sup>2</sup>

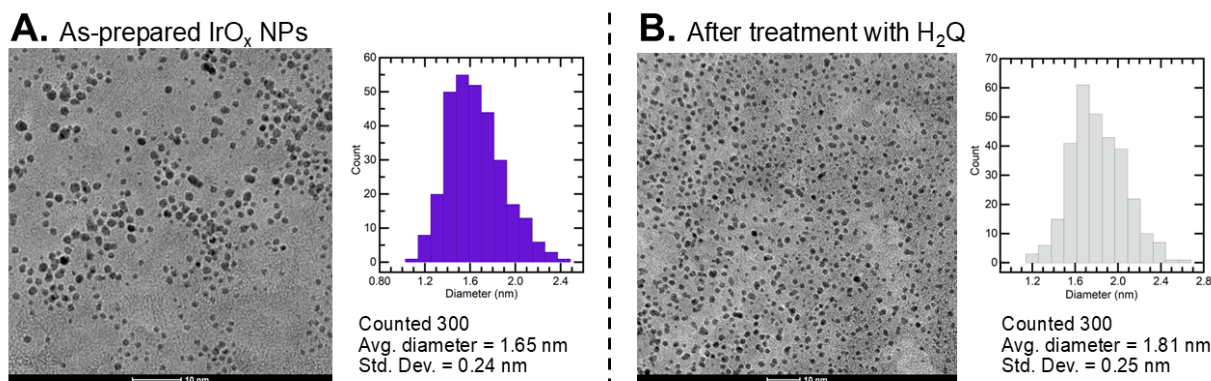

**Figure S2.** TEM images of the IrO<sub>x</sub> NPs before (A) [same as in Figure S1] and after (B) treatment with H<sub>2</sub>Q (1 mL of the as-prepared IrO<sub>x</sub> + 0.8 μmol H<sub>2</sub>Q, 1.2 equiv. H<sub>2</sub>Q using the 2 oxidizing equivalents : 1 H<sub>2</sub>Q ratio) after 5 hours. A small increase in NP diameter was observed. The scale bars are 10 nm.

ICP-MS was performed to determine the [Ir] concentration of the colloidal solution. 1.000 mL of the as-prepared IrO<sub>x</sub> NPs were digested with 4.000 mL aqua regia (4:1 HCl:HNO<sub>3</sub> [concentrated acids]) for 3 days, then further diluted 2000-fold *via* serial dilutions using 1% HNO<sub>3</sub> (aq); the total dilution was 10,000-fold. An Ir ICP-MS calibration curve was prepared using known diluted samples of an Ir standard, and the [Ir] of the colloidal solution was found to be  $1.682 \pm 0.007$  mM in 3 samples (Figure S3), which is in good agreement with the expected [Ir] of 1.743 mM (96.5 %) from the amount of initial material used.

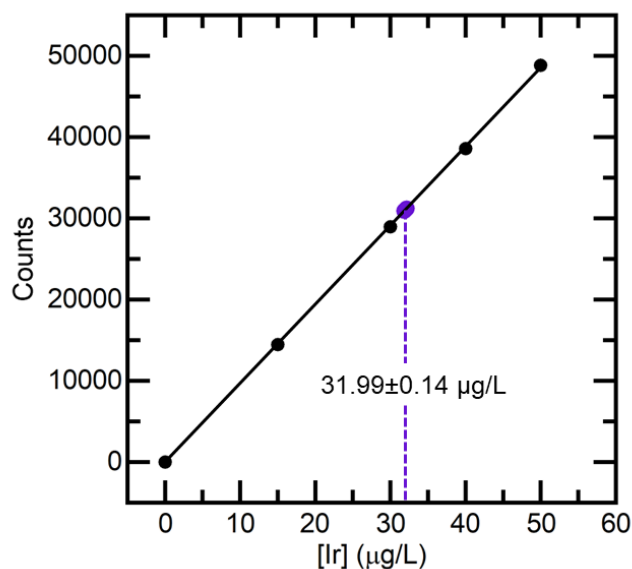

**Figure S3.** ICP-MS quantification of [Ir] content in IrO<sub>x</sub> NP samples. The IrO<sub>x</sub> solution was digested by aqua regia then diluted in 1% HNO<sub>3</sub> (aq) (total 10,000-fold dilution).  $31.99 \pm 0.14$  μg/L [Ir] was measured by ICP-MS. The undiluted NP sample is calculated to contain  $319900 \pm 1400$  μg/L [Ir], or 1.682 mM [Ir]. This is in good agreement with the expected [Ir], 1.743 mM. Reproduced from Lee, J. L.; Gentry, N. E.; Peper, J. L.; Hetzel, S.; Quist, C.; Menges, F. S.; Mayer, J. M. *ACS Nano* **2025**, *19*, 10289–10300. Copyright 2025 American Chemical Society.<sup>2</sup>

TEM imaging determined the diameter of the NPs to be  $1.65 \pm 0.24$  nm (Figure S1). Based on the measured NP average radius ( $r_{\text{NP}} = \text{diameter}/2 = 1.65 \text{ nm}/2 = 0.825 \text{ nm}$ ) and the density of rutile IrO<sub>2</sub> ( $11.66 \text{ g cm}^{-3}$ ) as an approximation, each IrO<sub>x</sub> NP is calculated to contain  $\sim 73$  Ir atoms (eqs. S1, S2, S3).

$$(4/3)\pi r_{\text{NP}}^3 \times \text{density} = (4/3)\pi(8.25 \times 10^{-8} \text{ cm})^3 \times (11.66 \text{ g cm}^{-3}) = 2.74 \times 10^{-20} \text{ g per NP} \quad \text{eq. S1}$$

$$(2.74 \times 10^{-20} \text{ g per NP}) / (224.22 \text{ g IrO}_2 \text{ mol}^{-1}) = 1.22 \times 10^{-22} \text{ mol IrO}_2 \text{ per NP} \quad \text{eq. S2}$$

$$(1.22 \times 10^{-22} \text{ mol IrO}_2 \text{ per NP}) * (1 \text{ mol Ir}) / (1 \text{ mol IrO}_2) * (6.022 \times 10^{23} \text{ atoms Ir/mol Ir}) \\ = 73 \text{ atoms Ir per NP} \quad \text{eq. S3}$$

The number of surface Ir atoms is estimated by assuming the thickness of the surface layer is the length of a typical Ir–O which is estimated as  $0.20 \text{ nm}$ .<sup>3</sup> The volume of the surface ( $V_{\text{surface}}$ ) was calculated (eq. S4) by subtracting the volume of the spherical NP ( $V_{\text{NP}}$ ) by the volume of the bulk ( $V_{\text{bulk}}$ ).

$$V_{\text{surface}} = V_{\text{NP}} - V_{\text{bulk}} \quad \text{eq. S4}$$

The surface layer thickness is defined as within one Ir–O bond. Therefore, the radius of the spherical bulk ( $r_{\text{bulk}}$ ) is 2 Ir–O bonds shorter than  $r_{\text{NP}}$  (eq. S5).

$$r_{\text{bulk}} = r_{\text{NP}} - [2 \times d(\text{Ir–O})] = r_{\text{NP}} - (2 \times 0.199 \text{ nm}) \quad \text{eq. S5}$$

The volume of the surface ( $V_{\text{surface}}$ ) can therefore be calculated to be  $2.03 \text{ nm}^3$  (eq. S6).

$$V_{\text{surface}} = V_{\text{NP}} - V_{\text{bulk}}$$

$$V_{\text{surface}} = (4/3)\pi r_{\text{NP}}^3 - (4/3)\pi r_{\text{bulk}}^3 = (4/3)\pi(0.825 \text{ nm})^3 - (4/3)\pi(0.825 \text{ nm} - 2 \times 0.199 \text{ nm})^3 \\ = (4/3)\pi(0.825 \text{ nm})^3 - (4/3)\pi(0.825 \text{ nm} - 2 \times 0.199 \text{ nm})^3 \\ = 2.03 \text{ nm}^3 \quad \text{eq. S6}$$

$V_{\text{surface}}$  is 86% of  $V_{\text{NP}}$  (eq. S7), so the surface should contain 63 Ir atoms (eq. S8). Alternatively, the unit cell volume of IrO<sub>2</sub> ( $V_{\text{uc}} = 0.0645 \text{ nm}^3$ ) and the number of Ir atoms per IrO<sub>2</sub> unit cell (2) can be used to calculate 63 Ir atoms on the surface (eqs. S9, S10).

$$V_{\text{surface}} / V_{\text{NP}} = 0.86 \quad \text{eq. S7}$$

$$73 \text{ Ir atoms per NP} * 0.86 = 63 \text{ Ir atoms per NP surface} \quad \text{eq. S8}$$

$$V_{\text{surface}} / V_{\text{uc}} = (2.03 \text{ nm}^3) / (0.0645 \text{ nm}^3 \text{ per unit cell}) = 31.5 \text{ unit cells on the surface} \quad \text{eq. S9}$$

$$(31.5 \text{ unit cells on the surface}) * (2 \text{ Ir atoms per unit cell}) = 63.0 \text{ Ir atoms per NP surface} \quad \text{eq. S10}$$

Section S3: Electrochemical measurements of the IrO<sub>x</sub> NPs

The full electrochemical window of the cyclic voltammetry measurement of the IrO<sub>x</sub> NPs is shown in Figure S4. A Pt electrode was used as the working electrode; Pt wire as the counter electrode; and Ag/AgCl electrode as the reference electrode. The pH was adjusted to pH 1.89 using a ~120 mM NaOH<sub>(aq)</sub> solution. Two PCET processes – Ir<sup>5+/4+</sup> and Ir<sup>4+/3+</sup> – were observed, but only the latter process is examined in this study.

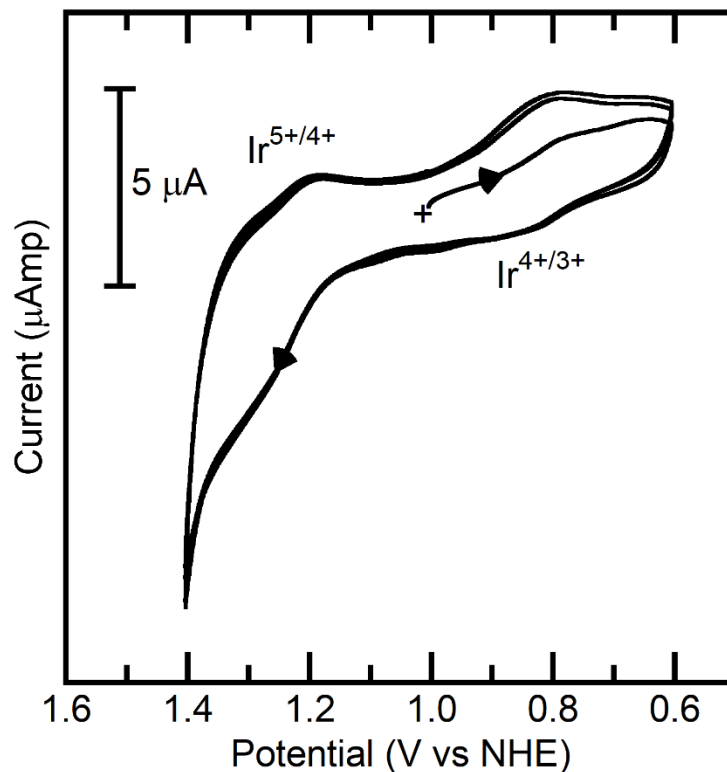

**Figure S4.** Full electrochemical window of the cyclic voltammogram of IrO<sub>x</sub> NPs. The as-prepared colloids were basified to pH 1.89 using NaOH<sub>(aq)</sub>, and the cyclic voltammogram was collected at a scan rate of 20 mV s<sup>-1</sup> at room temperature. A Pt electrode was used as the working electrode; Pt wire as the counter electrode; and Ag/AgCl electrode as the reference electrode. + indicates the open circuit potential.

pH-dependent cyclic voltammetry measurements were performed on the as-prepared IrO<sub>x</sub> NPs ([Ir] = 1.7 mM before dilution from basification). A boron-doped diamond electrode was used as the working electrode; Pt wire as the counter electrode; and Ag/AgCl electrode as the reference electrode. pH adjustment (pH 1.56 to 3.95) was achieved using a ~100 mM NaOH<sub>(aq)</sub> solution. Above pH > 4, the colloids aggregated over time, presumably due to decreasing electrostatic interactions to stabilize the nanoparticles. A selected number of voltammograms is illustrated in Figure 4A of the main text, which shows the  $E_{1/2}$  of the Ir<sup>4+/3+</sup> redox process shifts cathodically as the pH increases. The  $E_{1/2}$  values from 32 data points are tabulated and used to construct a Pourbaix diagram in Figure 4B of the main text.

Section S4: UV-vis and <sup>1</sup>H NMR titrations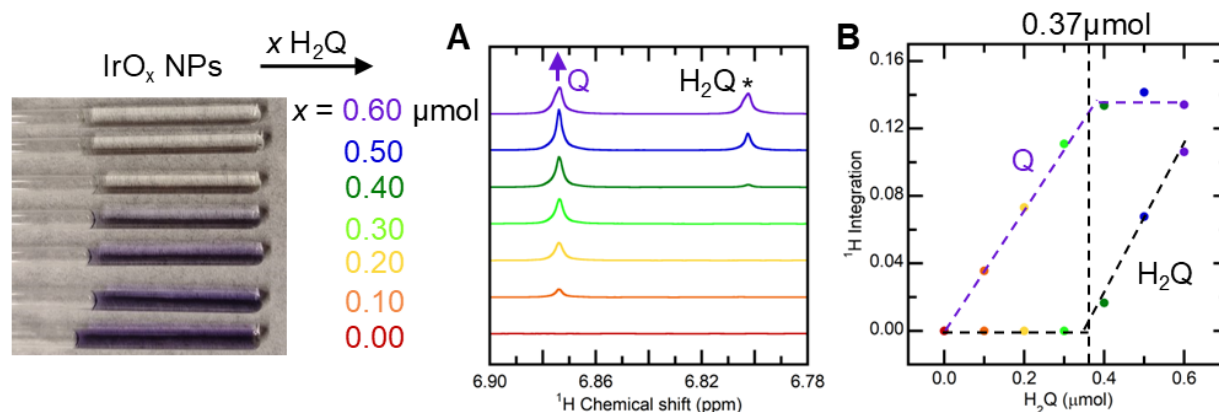

**Figure S5.** NMR titrations of IrO<sub>x</sub> NPs with aliquots (0.10 μmol) of hydroquinone (H<sub>2</sub>Q); the solvent was 83:17 H<sub>2</sub>O:D<sub>2</sub>O; (CH<sub>3</sub>)<sub>2</sub>SO<sub>2</sub> was used as an internal chemical shift (δ 3.14 ppm) and quantification reference. Addition of H<sub>2</sub>Q results in the growth of the benzoquinone (Q) features (indicated by the purple arrows) in the <sup>1</sup>H NMR spectra (A). The asterisks (\*) indicate excess Q. The integrations of the δ 6.87 ppm feature for Q and δ 6.80 ppm feature for H<sub>2</sub>Q are plotted in a Beer's law plot to quantify the oxidizing equivalents of IrO<sub>x</sub> (B).

Data from UV-vis titrations of as-prepared IrO<sub>x</sub> NPs with H<sub>2</sub>Q, [Co<sup>II</sup>(bpy)<sub>3</sub>]<sup>2+</sup>, ascorbic acid (AscH<sub>2</sub>), and sodium ascorbate (Na<sup>+</sup>AscH<sup>-</sup>) are shown in Figures S6-S9.

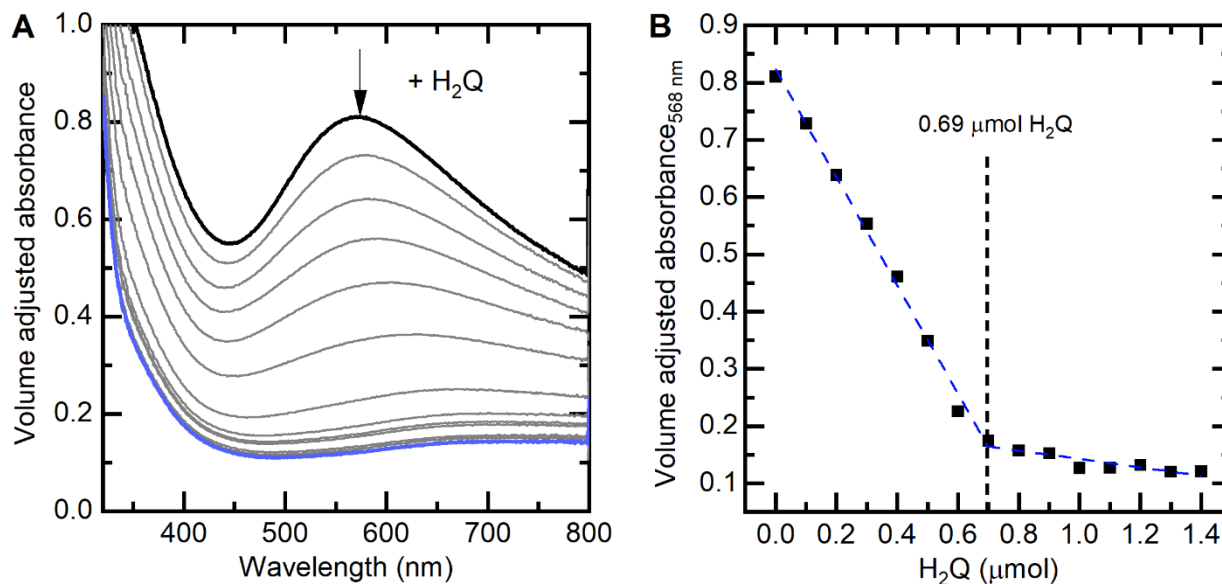

**Figure S6.** (A) Spectra from a UV-vis titration of IrO<sub>x</sub>+H<sub>2</sub>Q obtained from concurrent pH measurements discussed in Section II.B.3 of the main text. (B) Beer's Law plot of volume-corrected A<sub>568</sub> vs. μmol of H<sub>2</sub>Q added.

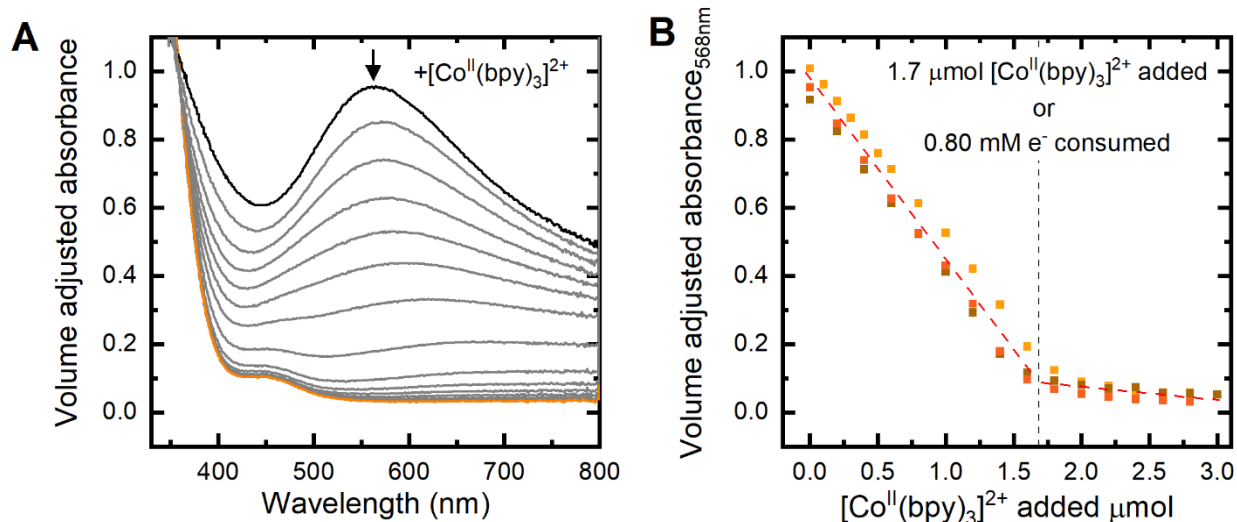

**Figure S7.** (A) UV-vis titration of IrO<sub>x</sub> NPs in H<sub>2</sub>O (2-fold diluted from the as-prepared NP batch) with [Co<sup>II</sup>(bpy)<sub>3</sub>]<sup>2+</sup>. Aliquots of [Co<sup>II</sup>(bpy)<sub>3</sub>]<sup>2+</sup> (0.2 μmol) result in incremental decrease of the IrO<sub>x</sub> optical absorbance. (B) Beer's law plot is used to quantify the oxidizing equivalents of IrO<sub>x</sub> NPs. The three different shades of orange represent three separate titrations of IrO<sub>x</sub> NPs with [Co<sup>II</sup>(bpy)<sub>3</sub>]<sup>2+</sup>.

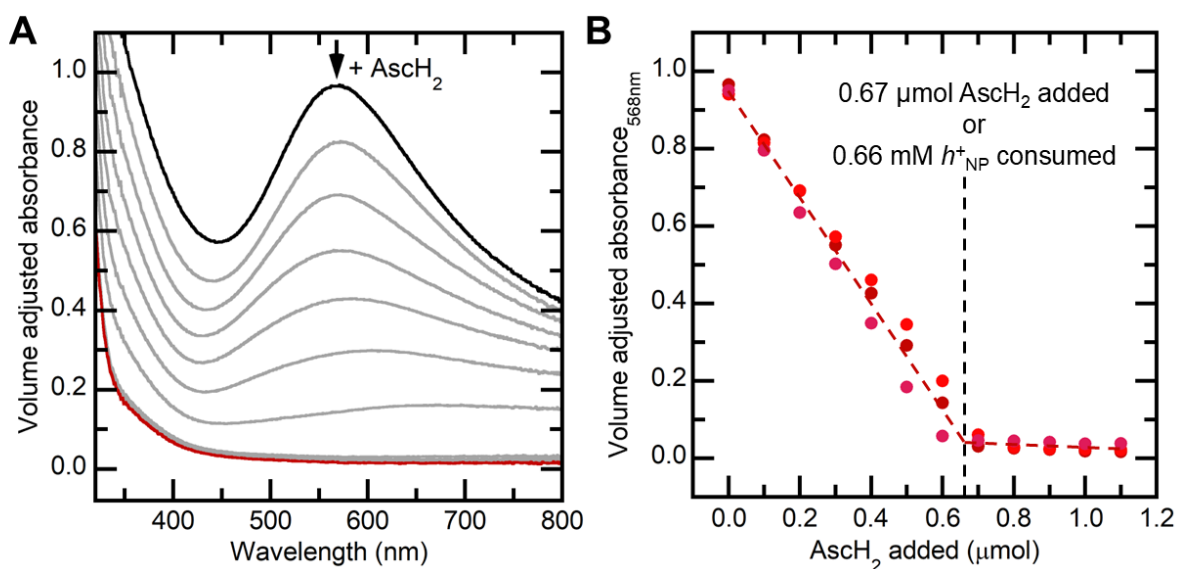

**Figure S8.** (A) UV-vis titration of IrO<sub>x</sub> NPs in H<sub>2</sub>O (2-fold diluted from the as-prepared NP batch) with a solution of ascorbic acid (AscH<sub>2</sub>). Aliquots of AscH<sub>2</sub> (0.1 μmol) result in incremental decrease of the IrO<sub>x</sub> optical absorbance. (B) Beer's law plot is used to quantify the oxidizing equivalents of IrO<sub>x</sub> NPs. The three different shades of red represent three separate titrations of IrO<sub>x</sub> NPs with AscH<sub>2</sub>.

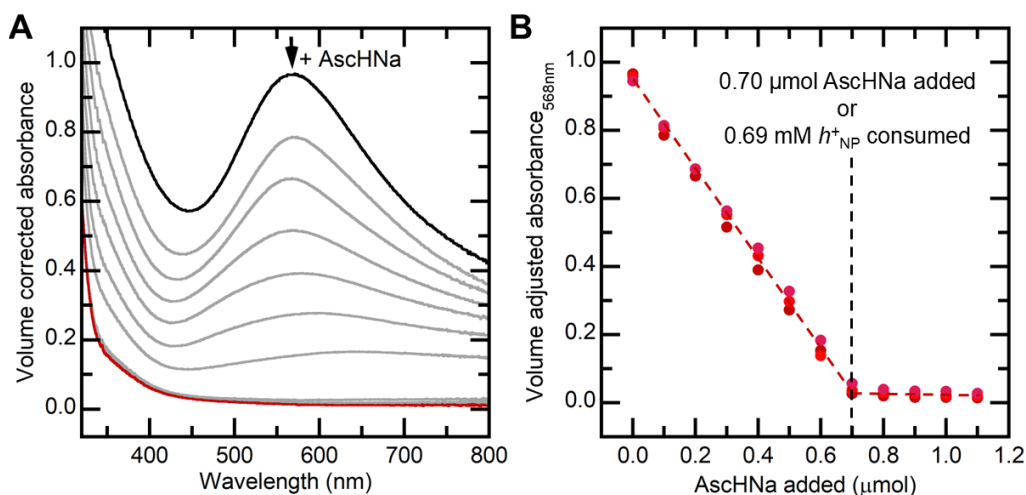

**Figure S9.** (A) UV-vis titration of IrO<sub>x</sub> NPs in H<sub>2</sub>O (2-fold diluted from the as-prepared NP batch) with a solution of sodium ascorbate (NaAscH). Aliquots of NaAscH (0.1 μmol) result in incremental decrease of the IrO<sub>x</sub> optical absorbance. (B) Beer's law plot is used to quantify the oxidizing equivalents of IrO<sub>x</sub> NPs. The three different shades of red represent three separate titrations of IrO<sub>x</sub> NPs with NaAscH.

The main text shows a titration of IrO<sub>x</sub> + H<sub>2</sub>Q monitored by pH. Similar experiments were attempted with AscH<sub>2</sub>, AscH<sup>-</sup> (Figure S10), and [Co<sup>II</sup>(bpy)<sub>3</sub>]<sup>2+</sup>. The AscH<sup>-</sup> was immediately protonated to AscH<sub>2</sub> under the titration conditions of pH 1.86. The results were roughly consistent with the H<sub>2</sub>Q titration. However, other observations of [Co<sup>II</sup>(bpy)<sub>3</sub>]<sup>2+</sup> in acid solutions suggested the possibility of loss of bpy on the timescale of the titration, which would prevent simple interpretation of the pH data in terms of IrO<sub>x</sub> proton stoichiometry. In the same vein, ascorbic acid is a more complicated reductant than the obligate 2e<sup>-</sup>, 2H<sup>+</sup> H<sub>2</sub>Q, as it can undergo self-condensation and other reactions.<sup>4-6</sup> Therefore, while two initial experiments are shown below, these titrations were not pursued.

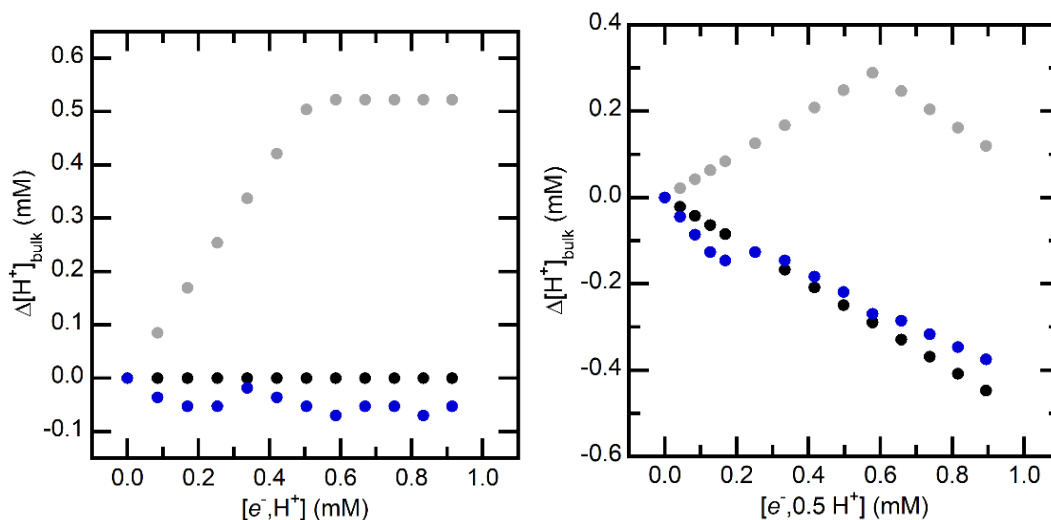

**Figure S10.** Preliminary pH titrations of as-prepared IrO<sub>x</sub> NPs with AscH<sub>2</sub> (left) and AscH<sup>-</sup> (right). The blue points are the experimental results; gray and black points are the Δ[H<sup>+</sup>]<sub>bulk</sub> values predicted if the reagents only added e<sup>-</sup> or 1e<sup>-</sup>+1H<sup>+</sup>, respectively.

UV-Vis titrations of as-prepared IrO<sub>x</sub> NPs with Na<sub>2</sub>SO<sub>4</sub>, oxone, and KI.

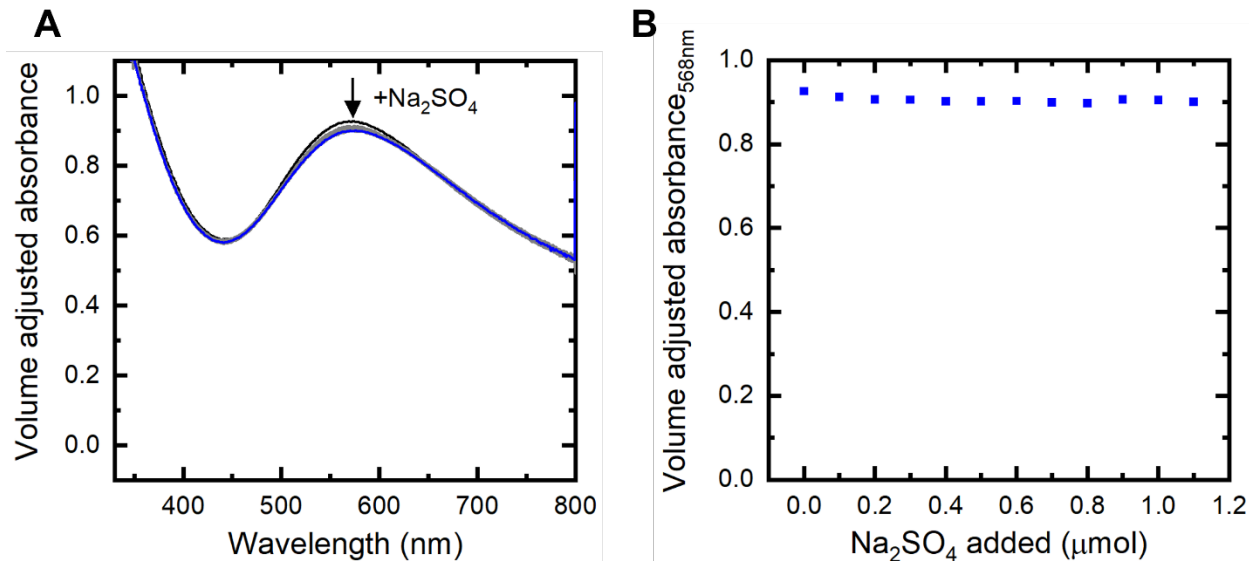

**Figure S11.** (A) UV-vis titration of IrO<sub>x</sub> NPs in H<sub>2</sub>O (2-fold diluted from the as-prepared NP batch) with Na<sub>2</sub>SO<sub>4</sub>. (B) 568 nm absorbance changes during the incremental addition of Na<sub>2</sub>SO<sub>4</sub> aliquots, showing little change.

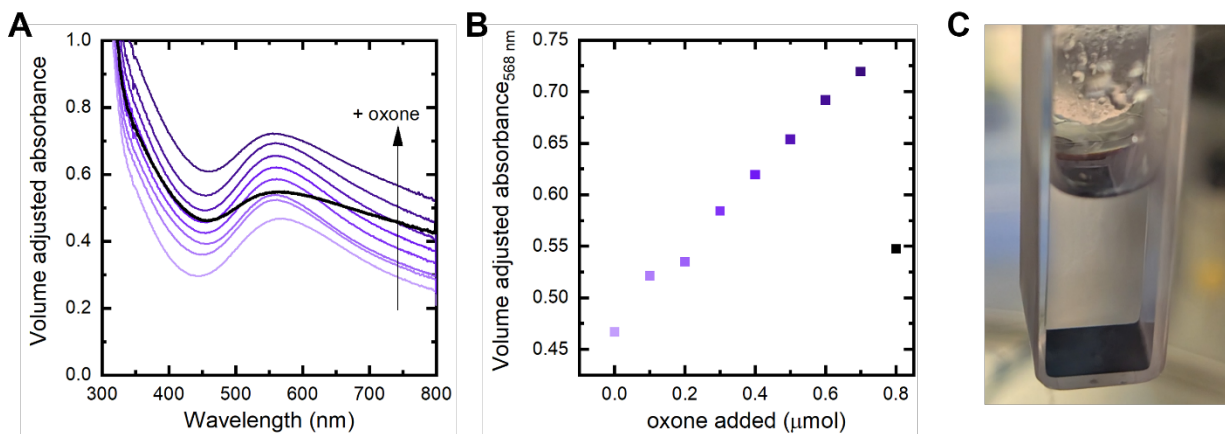

**Figure S12.** (A) UV-Vis titration of as-prepared IrO<sub>x</sub> NPs in H<sub>2</sub>O (4-fold diluted from the as-prepared NP batch) with oxone. Black spectrum indication final aliquot added, showing a decrease in the absorbance. (B) Beer's law plot showing the drop in absorbance at 568 nm once 0.8 μmol of oxone is added. (C) Optical image of IrO<sub>x</sub> NPs after 0.8 μmol of oxone is added, with particles no longer in a colloidal suspension. The dark region at the bottom of the cuvette is the precipitated, oxidized NPs.

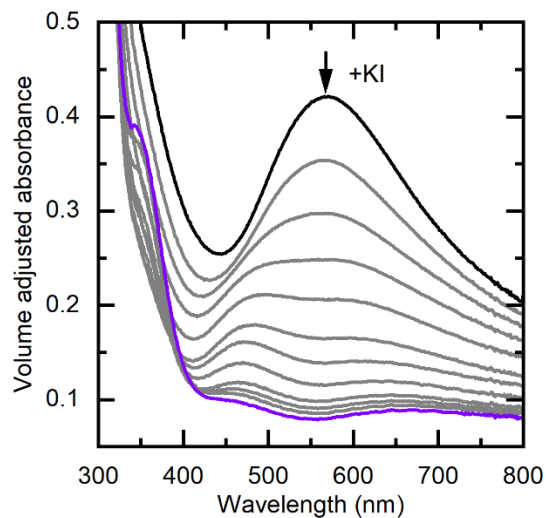

**Figure S13.** UV-vis titration of IrO<sub>x</sub> NPs in H<sub>2</sub>O (2-fold diluted from the as-prepared NP batch) with KI. Aliquots of KI (0.1 μmol) result in incremental decrease of the IrO<sub>x</sub> optical absorbance.

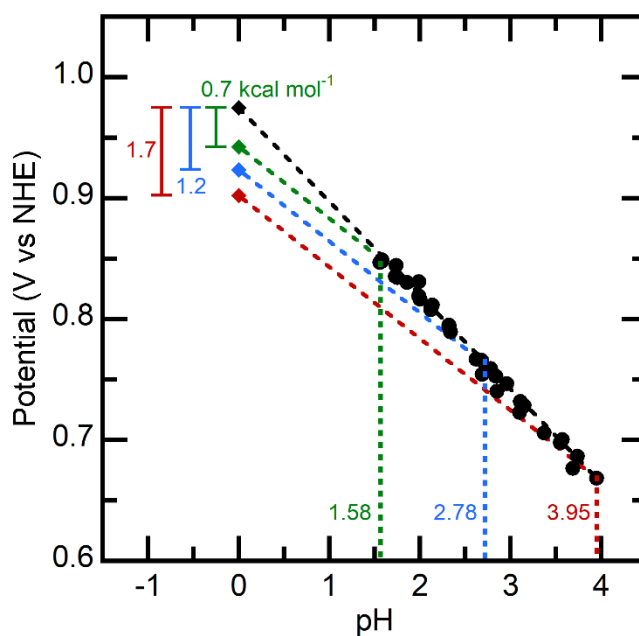

**Figure S14.** Extrapolating the  $E^\circ$  using the  $-79$  mV/pH slope (black), using the  $-59$  slope from pH 1.58 (green), from pH 2.78 (blue), from pH 3.95 (red).

## Section S5: Experimental details for UV-vis spectroelectrochemistry

UV-vis spectroelectrochemistry was performed using the Cary5000 spectrophotometer in conjunction with a Pine Research Honeycomb Spectroelectrochemistry setup, which consisted of a patterned “honeycomb” electrode mounted inside a thin-layer quartz cuvette (1.7 mm pathlength, Figure S15). The “honeycomb” electrode was Pt-based, and an Ag/AgCl reference electrode was also used. All voltammograms were converted from the Ag/AgCl reference to NHE (+0.21 V) as an internal standard. All measurements are at room temperature. pH adjustments were done with diluted (~100 mM) NaOH.

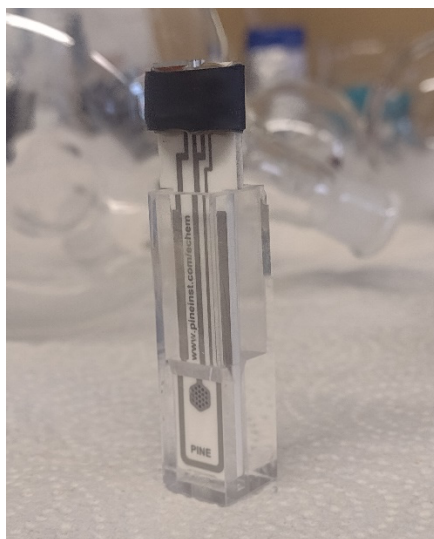

**Figure S15.** The Pine Research Honeycomb spectroelectrochemistry cell used in this study. The quartz cuvette has a 1.7 mm pathlength. The patterned “honeycomb” electrode is Pt-based, and an external Ag/AgCl reference electrode was also used.

1.5 mL IrO<sub>x</sub> NP solution was added to the cuvette, and the “honeycomb” and Ag/AgCl reference electrodes were assembled inside the cell. Controlled potential electrolysis was performed at applied potentials ( $E_{\text{applied}}$ ) ranging from 0.53 to 1.13 V vs NHE at 0.025 V intervals (Figure 5A of the main text). Under a potential bias, the charge passed was monitored until it reached plateau. Simultaneously, the UV-vis spectra of the electrolyzed colloids were recorded at 2-minute intervals, until the spectra stopped changing. The optical spectra at different applied potentials are compared in Figure 5B. The colloids’ absorbance at 568 nm was converted to a H-atom surface coverage ( $\theta_{\text{H}}$ ) using the chemical titration values that previously determined the oxidizing equivalents in the IrO<sub>x</sub> NPs (e.g., Figure 1).  $\theta_{\text{H}}$  was then plotted against  $E_{\text{applied}}$  in Figure 5C to produce the H-atom binding isotherm. The experimental data (colored circles) was fitted with the Frumkin isotherm (eq. 15) using Igor Pro 9.  $E^{\circ}_{\text{isotherm}}$  and  $C$  were set as the variables, yielding  $E^{\circ}_{\text{isotherm}} = 1.01$  V vs NHE (BDFE([IrO<sub>x</sub>]-H) = 76 kcal mol<sup>-1</sup>) and  $C = 0.28$  V (6.5 kcal mol<sup>-1</sup>).

The redox reversibility of the colloids was tested under the spectroelectrochemistry experimental conditions (Figure S16). The NPs were cycled between applied potentials of 0.56 and

1.07 V vs NHE, and their optical spectra were recorded (Figure S16A). The absorbance at 568 nm showed only a small deviation after 4 cycles (Figure S16B), demonstrating the redox reversibility of the NPs similar to the chemical treatment with H<sub>2</sub>Q / NaIO<sub>3</sub> (Figure 2).

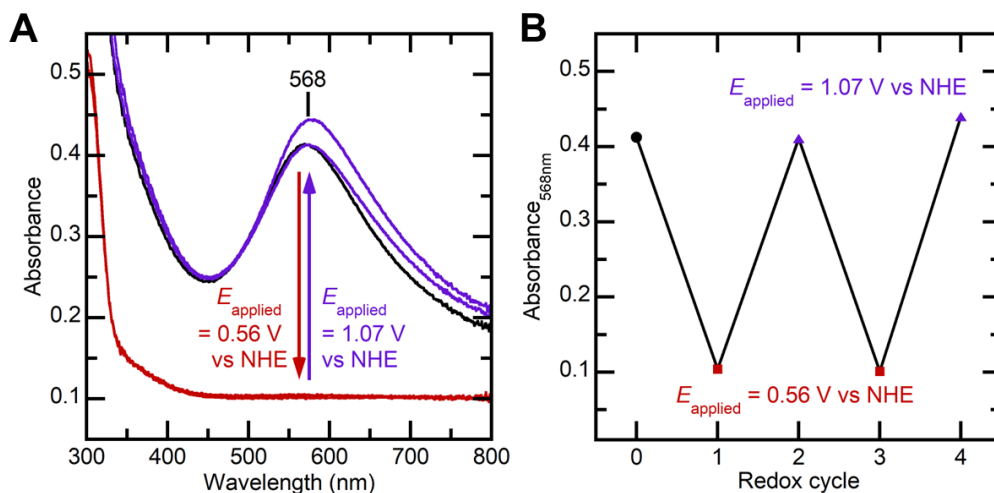

**Figure S16.** (A) Optical spectra of the NPs cycled between applied potentials of 0.56 and 1.07 V vs NHE in water (pH = 1.86, acidified by HNO<sub>3(aq)</sub>) at room temperature. (B) Absorbance measurements at 568 nm of the NPs cycled between 0.56 and 1.07 V vs NHE. A boron-doped diamond electrode was used as the working electrode; Pt wire as the counter electrode; and Ag/AgCl electrode as the reference electrode.

## Section S6: OAT reactivity

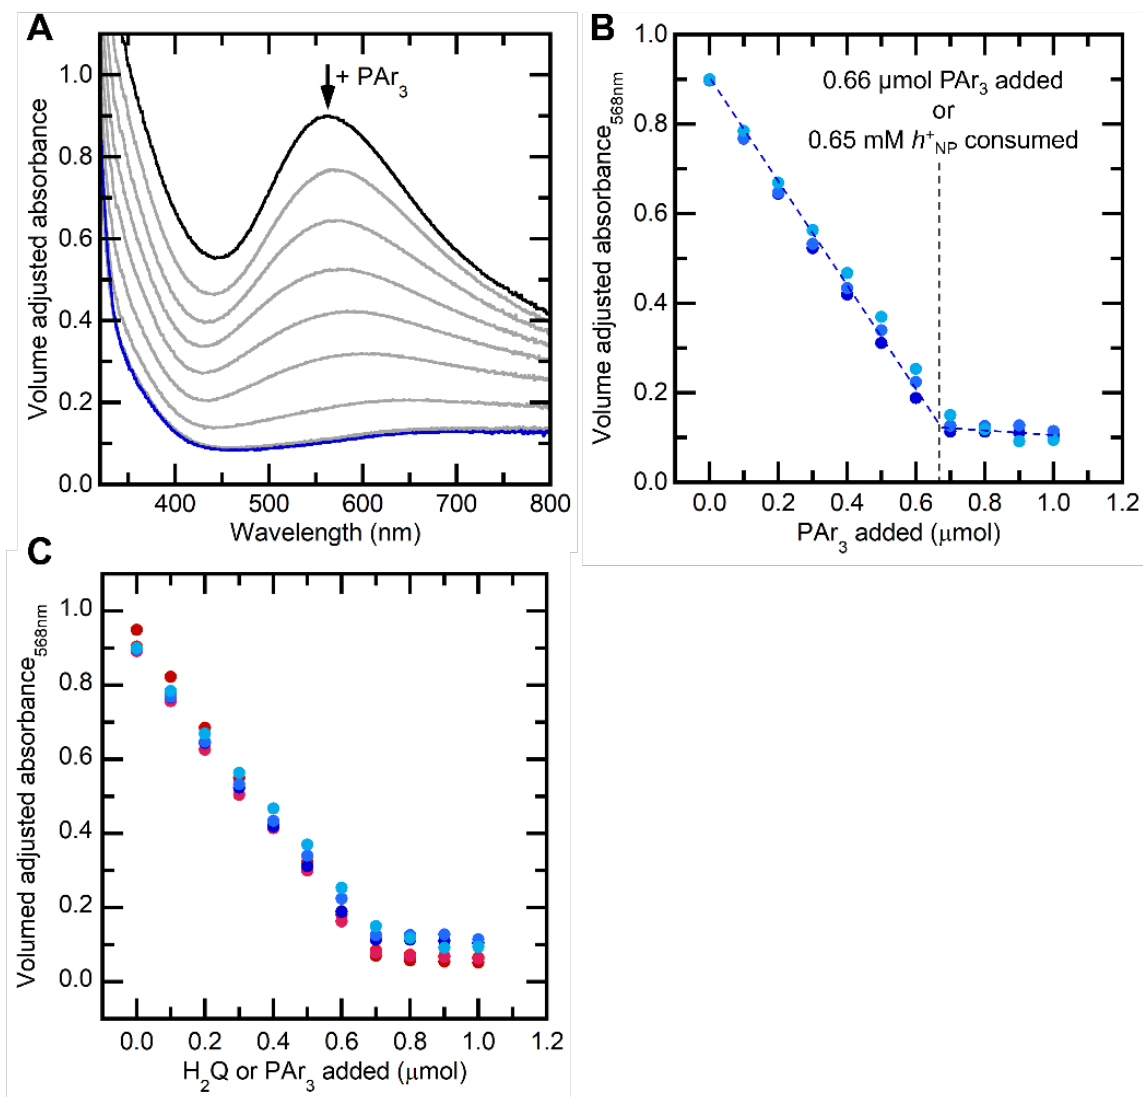

**Figure S17.** (A) UV-vis titration of IrO<sub>x</sub> NPs in H<sub>2</sub>O (2-fold diluted from the as-prepared NP batch) with PAR<sub>3</sub>. Aliquots of PAR<sub>3</sub> (0.1 μmol) result in incremental decrease of the IrO<sub>x</sub> optical absorbance. (B) Beer's law plot is used to quantify the oxidizing equivalents of IrO<sub>x</sub> NPs. The three different shades of blue represent three separate titrations of IrO<sub>x</sub> NPs with PAR<sub>3</sub>. Reproduced from Lee, J. L.; Gentry, N. E.; Peper, J. L.; Hetzel, S.; Quist, C.; Menges, F. S.; Mayer, J. M. *ACS Nano* **2025**, *19*, 10289–10300. Copyright 2025 American Chemical Society.<sup>2</sup> (C) PAR<sub>3</sub> titration Beer's law plot triplicate comparison (blue) with H<sub>2</sub>Q (red).

Our experimental observations show a similar pH change in the reaction of IrO<sub>x</sub> and PAR<sub>3</sub> as was observed with the H<sub>2</sub>Q. Upon titrating with PAR<sub>3</sub>, the bulk pH gradually decreased, corresponding with an additional uptake of  $\sim 0.82 \mu\text{mol H}^+$  from the bulk solution (Figure S18). The PAR<sub>3</sub> overall corresponded with  $\sim 1.3 \text{ H}^+$  per  $1e^-$  transfer, agreeing closely with the chemical reactivity with H<sub>2</sub>Q in Section II.B.3 and the *electrochemical* behavior discussed in Section II.B.4.

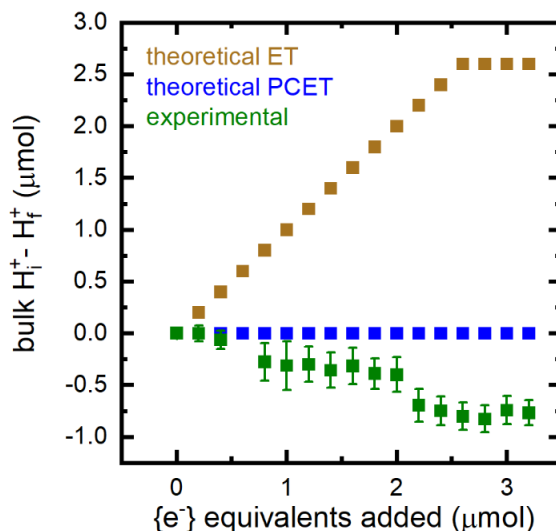

**Figure S18.** Change in bulk H<sup>+</sup> (μmol) upon the addition of H<sup>+</sup>, e<sup>-</sup> (μmol; 1/2 μmol PAR<sub>3</sub>) calculated from pH change. Brown represents theoretical change for an ET, blue represents change for PCET, green represents experimental results. Experimental data was corrected for dilution effects.

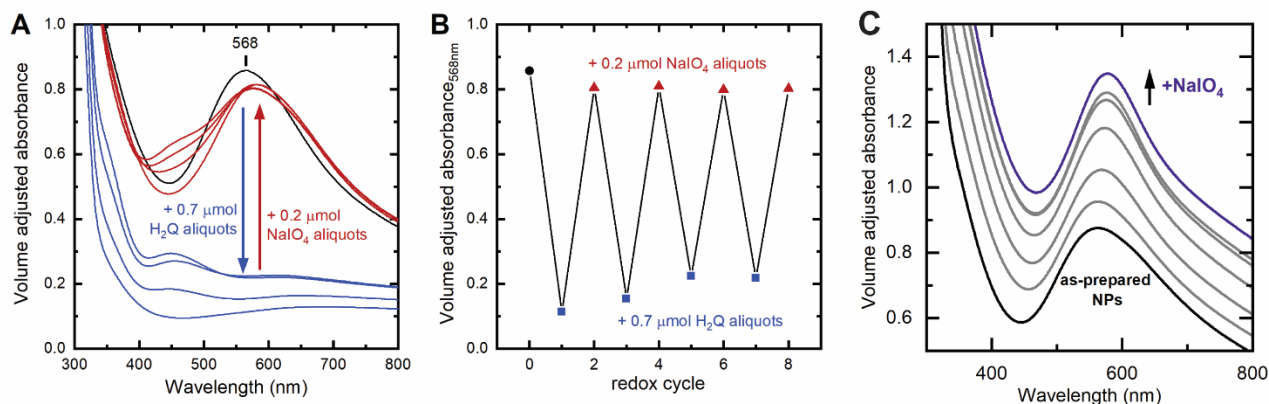

**Figure S19.** Redox cycling of IrO<sub>x</sub> NPs with H<sub>2</sub>Q as the reductant and NaIO<sub>4</sub> as the oxidant. (A) UV-vis spectra after cycles of reduction (blue arrow and spectra) and oxidation (red arrow and spectra). (B) Corrected absorbances after successive cycles of reduction (blue) then oxidation (red). (C) UV-vis spectra of as-prepared IrO<sub>x</sub> NPs further oxidized with aliquots of NaIO<sub>4</sub> (0.1 μmol).

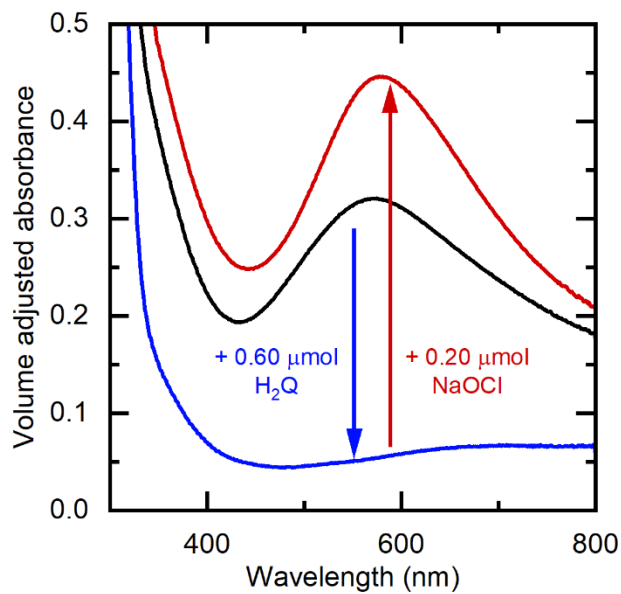

**Figure S20.** UV-vis spectra of IrO<sub>x</sub> NPs upon reduction with H<sub>2</sub>Q (blue arrow and spectra) and oxidation with NaOCl (red arrow and spectra), demonstrating that the NPs can be further oxidized above Ir<sup>3.8+</sup> using NaOCl.

---

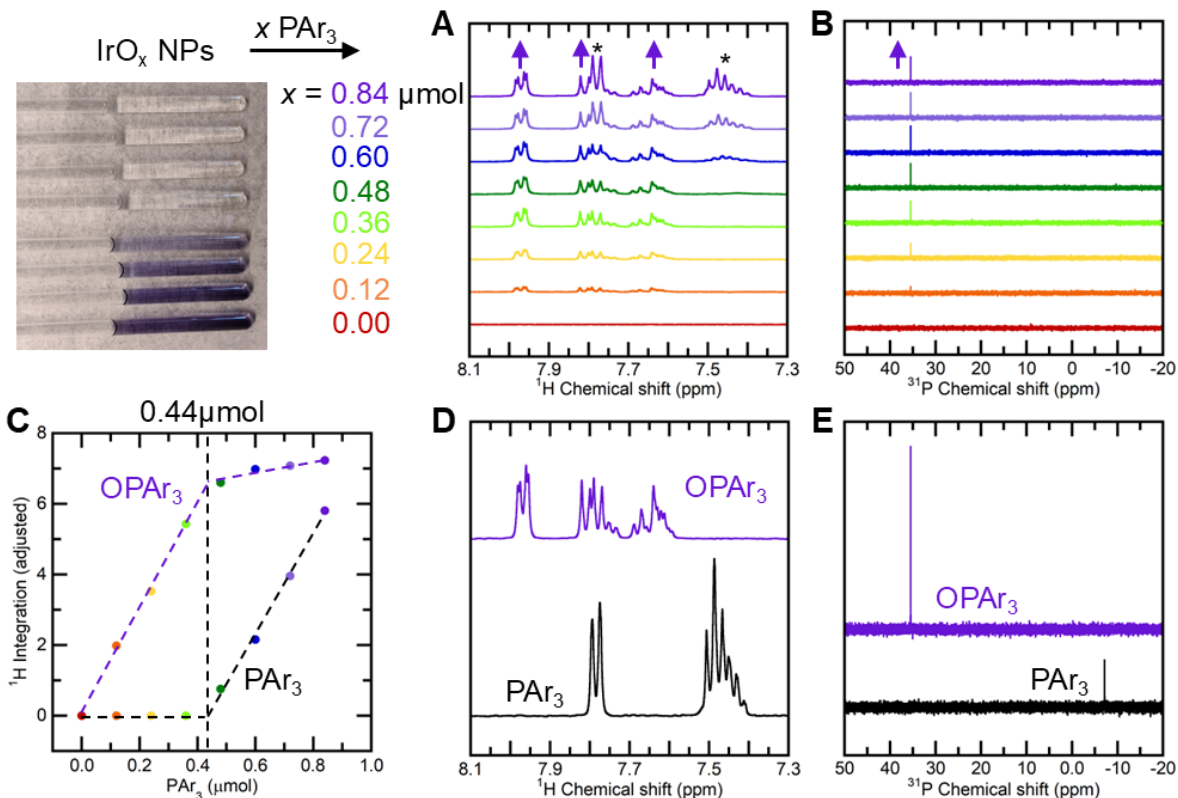

**Figure S21.** NMR titrations of IrO<sub>x</sub> NPs with aliquots (0.12 μmol) of PAR<sub>3</sub>; the solvent was 85:15 H<sub>2</sub>O:D<sub>2</sub>O; (CH<sub>3</sub>)<sub>2</sub>SO<sub>2</sub> was used as an internal chemical shift (δ 3.14 ppm) and quantification reference. Addition of PAR<sub>3</sub> results in the growth of the OPAr<sub>3</sub> features (indicated by the purple arrows) in the <sup>1</sup>H (A) and <sup>31</sup>P (B) NMR spectra. The asterisks (\*) indicate excess PAR<sub>3</sub>. The integrations of the δ 7.95 ppm feature for OPAr<sub>3</sub> and δ 7.45 ppm feature for PAR<sub>3</sub> are adjusted by the appropriate integrated Hs (4H and 9H, respectively), and then plotted in a Beer's law plot to quantify the oxidizing equivalents of IrO<sub>x</sub> (C). The <sup>1</sup>H (D) and <sup>31</sup>P (E) NMR spectra of the PAR<sub>3</sub> (black, 1.4 mM) and OPAr<sub>3</sub> (purple, 1.4 mM) standards. The solvent was 93:7 H<sub>2</sub>O:D<sub>2</sub>O. (CH<sub>3</sub>)<sub>2</sub>SO<sub>2</sub> was used as an internal chemical shift (δ 3.14 ppm) reference. Reproduced from Lee, J. L.; Gentry, N. E.; Peper, J. L.; Hetzel, S.; Quist, C.; Menges, F. S.; Mayer, J. M. *ACS Nano* **2025**, *19*, 10289–10300.<sup>2</sup> Copyright 2025 American Chemical Society.

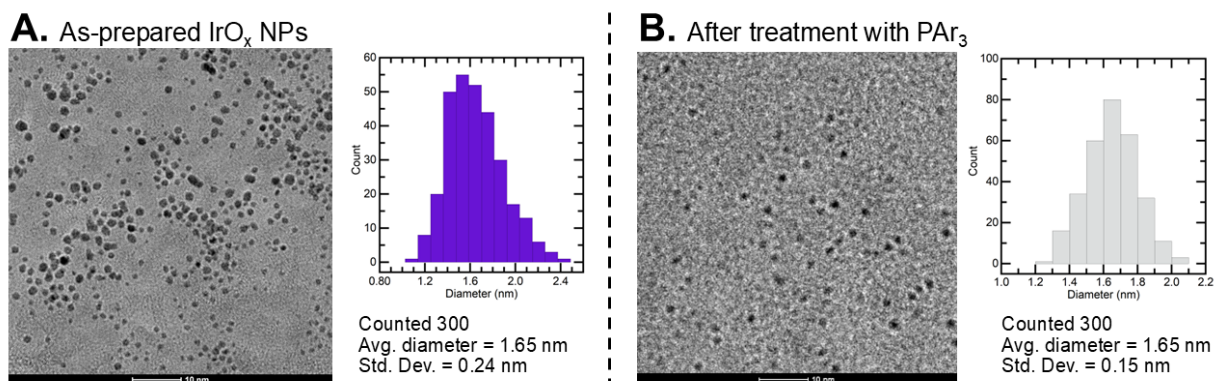

**Figure S22.** TEM images of the IrO<sub>x</sub> NPs before (A) and after (B) treatment with PAR<sub>3</sub> (750 μL of the as-prepared IrO<sub>x</sub> solution + 0.75 μmol PAR<sub>3</sub>, 1.1 equiv. PAR<sub>3</sub> using the 2 oxidizing equivalents : 1 PAR<sub>3</sub> ratio) after 2 days. No significant change to NP size was observed. The scale bars are 10 nm. Reproduced from Lee, J. L.; Gentry, N. E.; Peper, J. L.; Hetzel, S.; Quist, C.; Menges, F. S.; Mayer, J. M. *ACS Nano* **2025**, *19*, 10289–10300.<sup>2</sup> Copyright 2025 American Chemical Society.

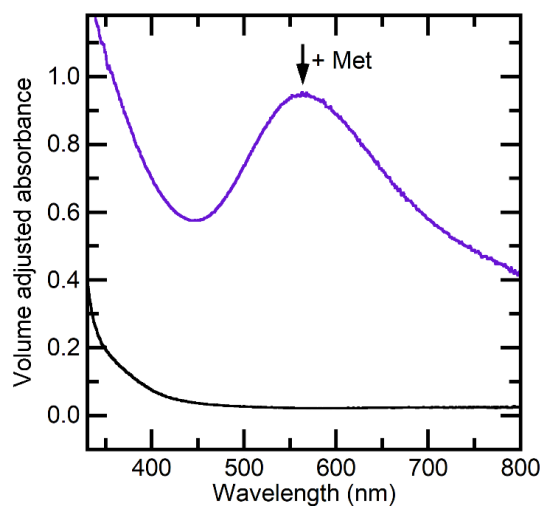

**Figure S23.** UV-vis measurements of before (purple) and after (black) the reaction of IrO<sub>x</sub> NPs with 1.0 equiv. Met (0.8 μmol) in H<sub>2</sub>O (pH 1.9) over 14 days. Reproduced from Lee, J. L.; Gentry, N. E.; Peper, J. L.; Hetzel, S.; Quist, C.; Menges, F. S.; Mayer, J. M. *ACS Nano* **2025**, *19*, 10289–10300.<sup>2</sup> Copyright 2025 American Chemical Society.

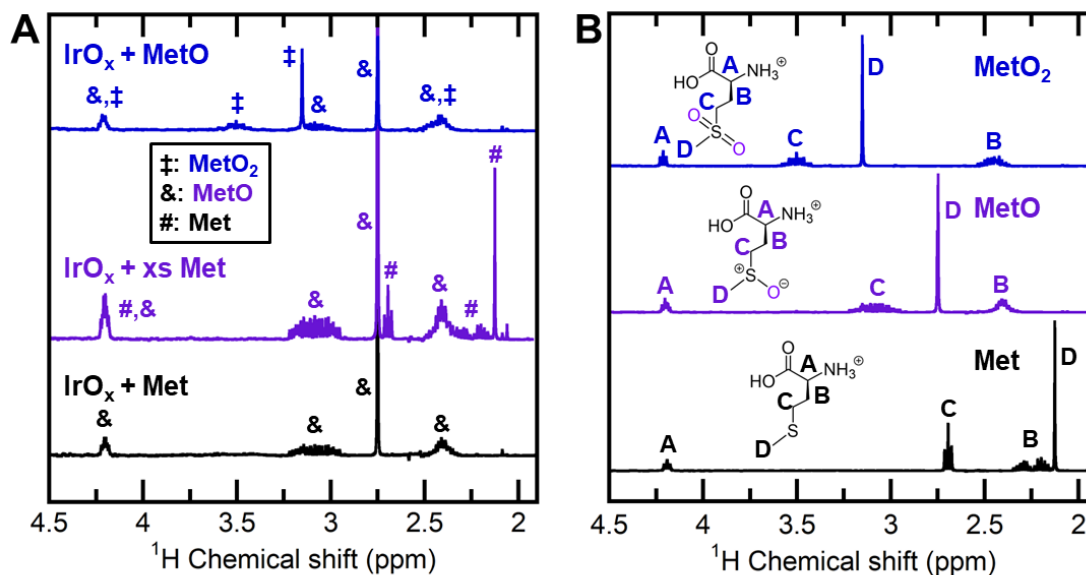

**Figure S24.** (A) NMR measurements of IrO<sub>x</sub> NPs reactions with sub-stoichiometric Met (0.7 equiv., 0.15 μmol, black), excess Met (1.4 equiv., 0.30 μmol, purple), and sub-stoichiometric MetO (0.7 equiv., 0.15 μmol, blue) after 9 days; (CH<sub>3</sub>)<sub>3</sub>COH was used as an internal chemical shift (δ 1.24 ppm) and quantification reference. Addition of Met results in growth of the MetO features (indicated by &) in the <sup>1</sup>H NMR spectrum (black). # indicates excess Met (purple). Addition of MetO (blue) results in the growth of the MetO<sub>2</sub> features (‡). (B) <sup>1</sup>H NMR spectra of the Met (black), MetO (purple), and MetO<sub>2</sub> (blue) standards at concentrations of 0.45 mM. The solvent was 75:25 H<sub>2</sub>O:D<sub>2</sub>O with a pH of ~1.7 (acidified by HNO<sub>3</sub>(aq)). Reproduced from Lee, J. L.; Gentry, N. E.; Peper, J. L.; Hetzel, S.; Quist, C.; Menges, F. S.; Mayer, J. M. *ACS Nano* **2025**, *19*, 10289–10300.<sup>2</sup> Copyright 2025 American Chemical Society.

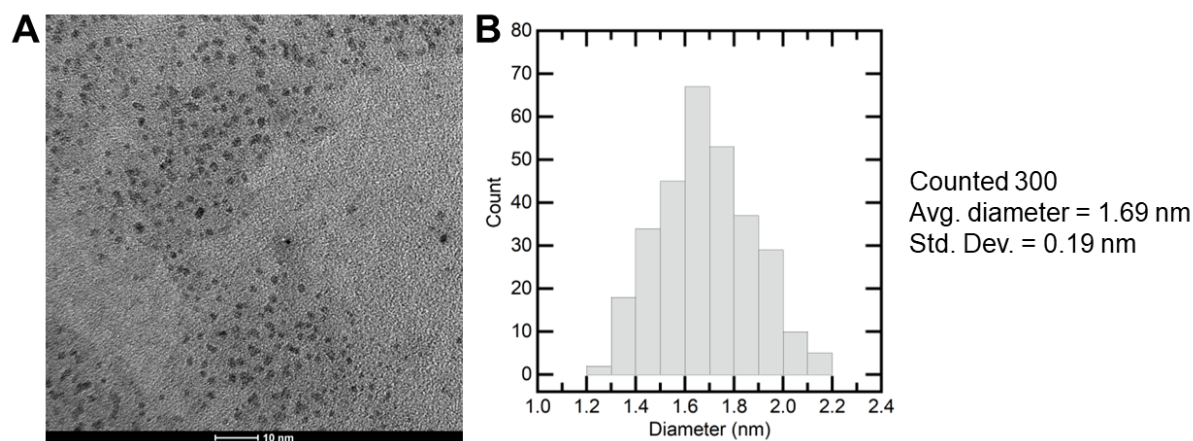

**Figure S25.** (A) TEM image of the IrO<sub>x</sub> NPs (500 μL of the as-prepared solution) after treatment with Met (0.75 μmol, 2.3 equiv. using the 2 oxidizing equivalents : 1 Met ratio) for 9 days. The scale bar is 10 nm. (B) The size distribution of the NPs. No significant change to NP size was observed. Reproduced from Lee, J. L.; Gentry, N. E.; Peper, J. L.; Hetzel, S.; Quist, C.; Menges, F. S.; Mayer, J. M. *ACS Nano* **2025**, *19*, 10289–10300.<sup>2</sup> Copyright 2025 American Chemical Society.

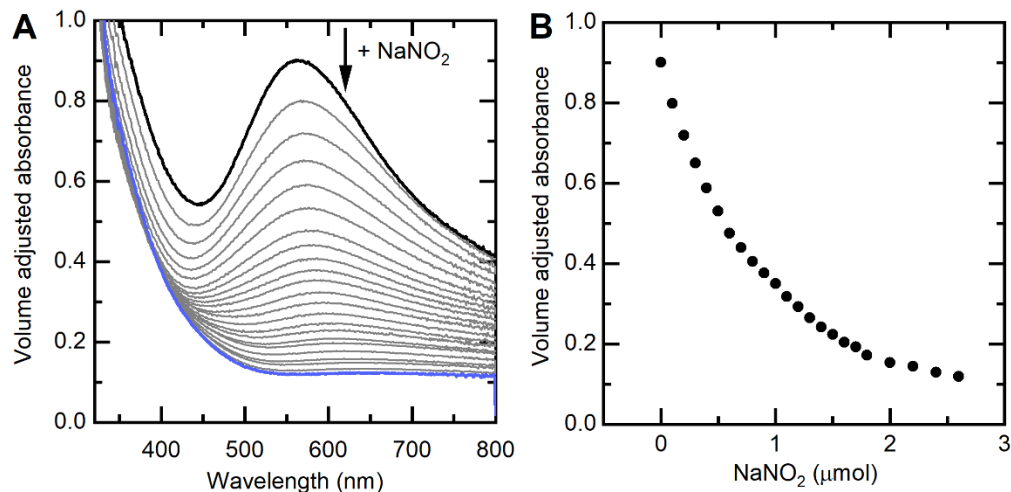

**Figure S26.** (A) UV-vis titration of IrO<sub>x</sub> NPs in H<sub>2</sub>O (2-fold diluted from the as-prepared NP batch) with NaNO<sub>2</sub>. Aliquots of NaNO<sub>2</sub> (0.1 μmol) result in incremental decrease of the IrO<sub>x</sub> optical absorbance. (B) Absorbance (volume adjusted) vs. nitrite added shows no clear titration endpoint.

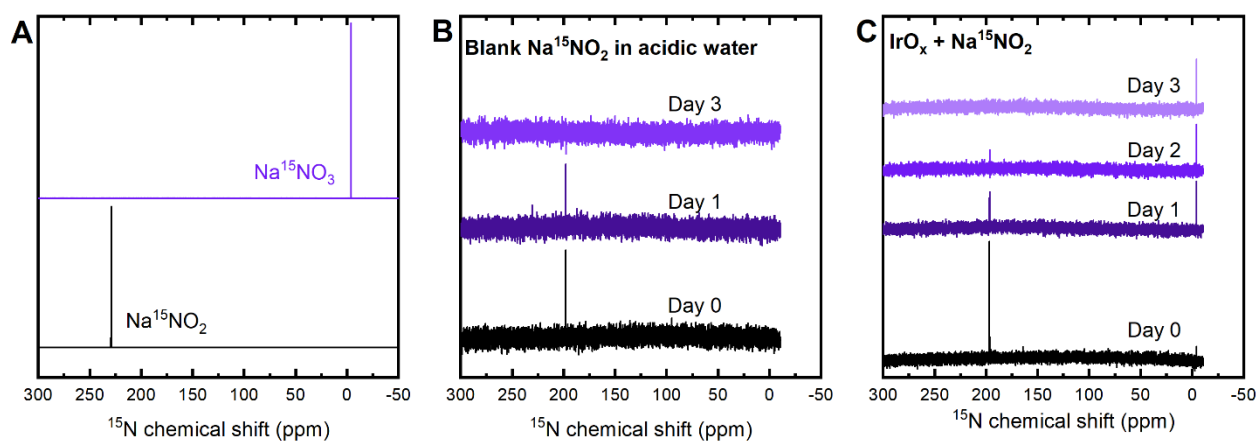

**Figure S27.** (A) <sup>15</sup>N NMR of 1 M Na<sup>15</sup>NO<sub>2</sub> (black, δ 229 ppm) and Na<sup>15</sup>NO<sub>3</sub> (purple, δ -4.04 ppm) standards in D<sub>2</sub>O. (B) <sup>15</sup>N NMR of 20 mM Na<sup>15</sup>NO<sub>2</sub> in D<sub>2</sub>O with a pH ~ 1.8 (acidified by HNO<sub>3</sub>) measured over three days. The upfield shift of the <sup>5</sup>NO<sub>2</sub><sup>-</sup> to δ 197 ppm is likely due to the formation of nitrous acid at this pH, followed by nitrosation,<sup>7</sup> as observed by the gradual disappearance of the NMR feature over 3 days. (C) <sup>15</sup>N NMR of IrO<sub>x</sub> NPs with 20 mM excess Na<sup>15</sup>NO<sub>2</sub> measured over 3 days. The growth of the δ -4.24 ppm is suggestive of the formation of the <sup>15</sup>NO<sub>3</sub><sup>-</sup> product.

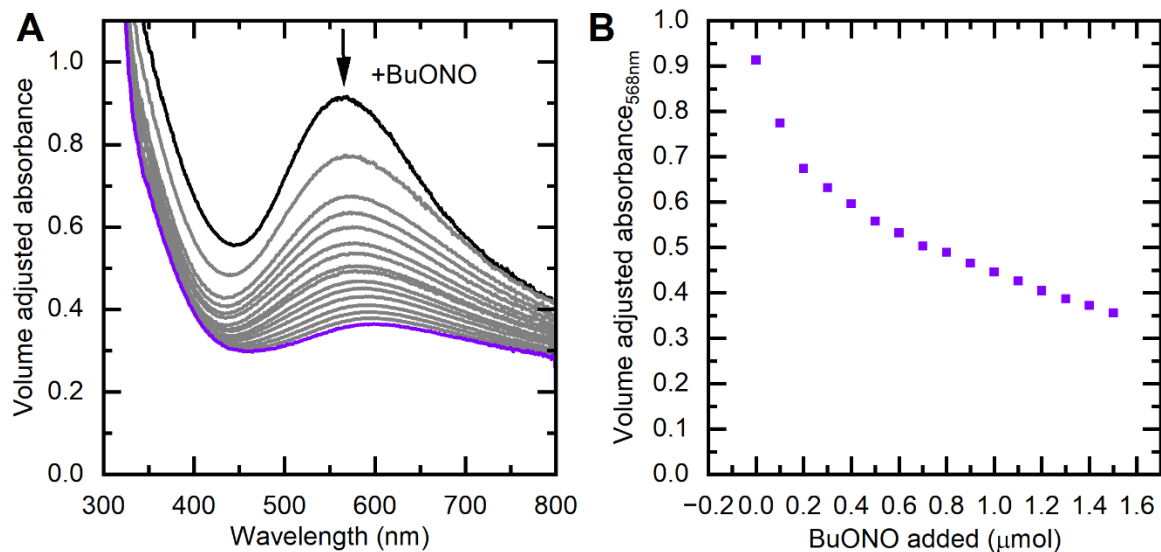

**Figure S28.** (A) UV-vis titration of IrO<sub>x</sub> NPs in H<sub>2</sub>O (2-fold diluted from the as-prepared NP batch) with *n*-butyl nitrate (BuONO). Aliquots of BuONO (0.1 μmol) result in little change in absorbance. Initial scan (black) and final scan (purple) were collected four months apart. (B) Absorbance (volume adjusted) vs. BuONO added shows no titration endpoint.

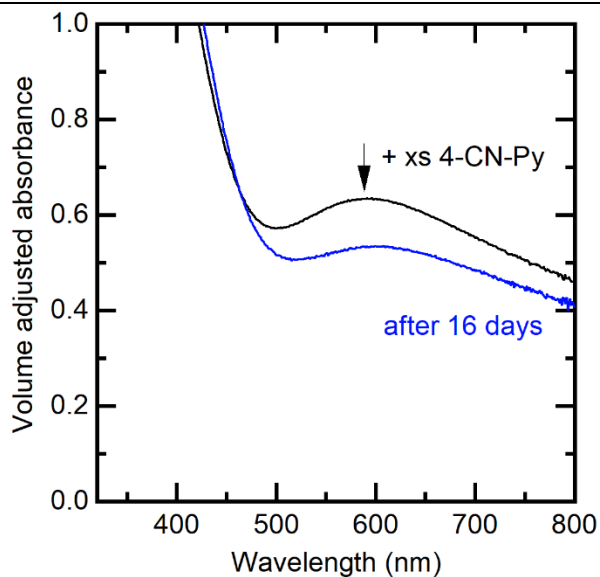

**Figure S29.** UV-vis titration of IrO<sub>x</sub> NPs in H<sub>2</sub>O (2-fold diluted from the as-prepared NP batch) with an excess of 20 mM 4-CN-pyridine (20 μmol) showing little change in absorbance after 16 days.

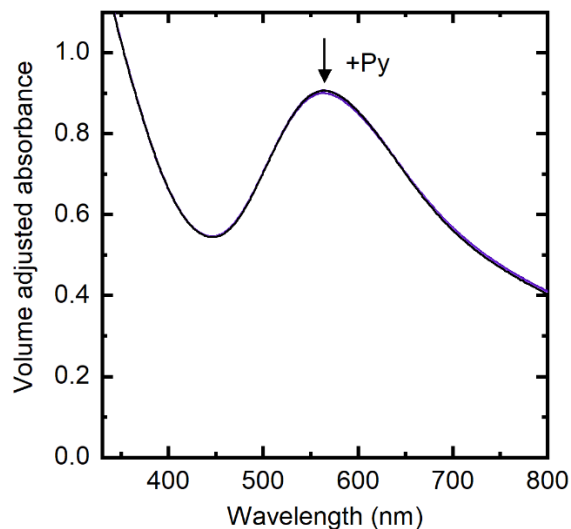

**Figure S30.** UV-vis titration of IrO<sub>x</sub> NPs in H<sub>2</sub>O (2-fold diluted from the as-prepared NP batch) with pyridine showing little change in absorbance.

---

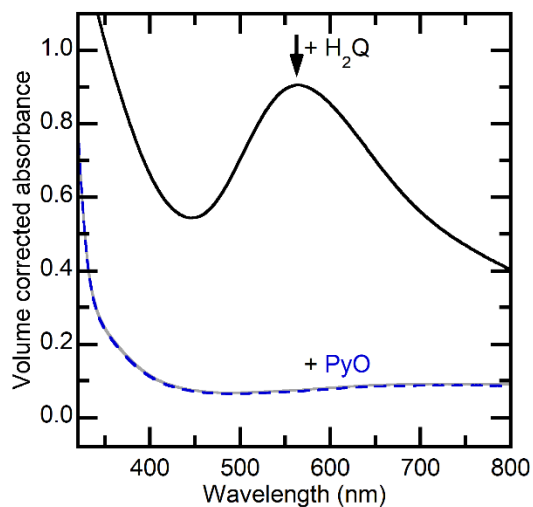

**Figure S31.** UV-vis measurements of before (black) and after (gray) the reaction of IrO<sub>x</sub> NPs with 1.0 equiv. H<sub>2</sub>Q (0.7 μmol) in H<sub>2</sub>O (pH 1.9), then with 1.3 equiv. pyO (0.9 μmol; blue dashed line). No reaction was observed between the reduced IrO<sub>x</sub> NPs and pyO over 2 hours.

---

## Section S7: Bond dissociation enthalpies (BDEs) and bond dissociation free energies (BDFEs) for Y–O substrates

Holm and Donahue compiled a large and valuable list of heats and free energies for the oxygenation of Y + 1/2 O<sub>2(g)</sub> to YO (eq. S11,  $\Delta H_{Y/YO}$  and  $\Delta G_{Y/YO}$ ), Table S1 below. For a Y/YO couple,  $\Delta H_{Y/YO}$  and  $\Delta G_{Y/YO}$  are the differences in the standard molar *enthalpies* or *free energies* of formation of YO and Y, respectively (eq. S11), because the  $\Delta_f H^\circ$  and  $\Delta_f G^\circ$  of O<sub>2(g)</sub> are by convention zero.

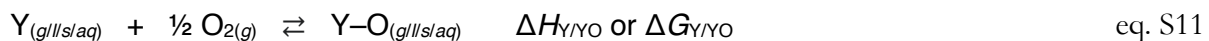

**Table S1.** Table of  $\Delta G_{Y/YO}$  and  $\Delta H_{Y/YO}$  values for various Y/YO couples.<sup>a,b</sup>

| Y                                                            | YO                                           | $\Delta G_{Y/YO}$ | $\Delta H_{Y/YO}$ | $\Delta G_{Y/YO} - \Delta H_{Y/YO}$ |
|--------------------------------------------------------------|----------------------------------------------|-------------------|-------------------|-------------------------------------|
| H <sub>2</sub> O <sub>(l)</sub>                              | H <sub>2</sub> O <sub>2</sub>                | +27.9             | +23.4             | +4.5                                |
| BrO <sub>3</sub> <sup>-</sup> <sub>(aq)</sub>                | BrO <sub>4</sub> <sup>-</sup>                | +23.8             | +19.1             | +4.7                                |
| KBrO <sub>3</sub> <sub>(s)</sub>                             | KBrO <sub>4</sub>                            | +23.1             | +17.3             | +5.8                                |
| Cl <sup>-</sup> <sub>(aq)</sub>                              | ClO <sup>-</sup>                             | +22.6             | +14.4             | +8.2                                |
| K <sub>2</sub> S <sub>2</sub> O <sub>7</sub> <sub>(s)</sub>  | K <sub>2</sub> S <sub>2</sub> O <sub>8</sub> | +22.5             | +16.8             | +5.7                                |
| OH <sup>-</sup> <sub>(aq)</sub>                              | HO <sub>2</sub> <sup>-</sup>                 | +21.5             | +16.7             | +4.8                                |
| Br <sup>-</sup> <sub>(aq)</sub>                              | BrO <sup>-</sup>                             | +16.9             | +6.56             | +10.34                              |
| IO <sub>3</sub> <sup>-</sup> <sub>(aq)</sub>                 | IO <sub>4</sub> <sup>-</sup>                 | +16.6             | +16.7             | -0.1                                |
| KIO <sub>3</sub> <sub>(s)</sub>                              | KIO <sub>4</sub>                             | +13.6             | +8.16             | +5.44                               |
| ClO <sup>-</sup> <sub>(aq)</sub>                             | ClO <sub>2</sub> <sup>-</sup>                | +12.9             | +9.70             | +3.2                                |
| I <sup>-</sup> <sub>(aq)</sub>                               | IO <sup>-</sup>                              | +3.12             | -12.5             | +15.62                              |
| NaClO <sub>3</sub> <sub>(s)</sub>                            | NaClO <sub>4</sub>                           | +1.8              | -4.9              | +6.7                                |
| ClO <sub>3</sub> <sup>-</sup> <sub>(aq)</sub>                | ClO <sub>4</sub> <sup>-</sup>                | -0.14             | -6.06             | +5.92                               |
| ClO <sub>2</sub> <sup>-</sup> <sub>(aq)</sub>                | ClO <sub>3</sub> <sup>-</sup>                | -6.00             | -8.95             | +2.95                               |
| HSeO <sub>3</sub> <sup>-</sup> <sub>(aq)</sub>               | HSeO <sub>4</sub> <sup>-</sup>               | -9.76             | -16.0             | +6.24                               |
| AgNO <sub>2</sub> <sub>(s)</sub>                             | AgNO <sub>3</sub>                            | -12.6             | -19.0             | +6.4                                |
| SeO <sub>3</sub> <sup>2-</sup> <sub>(aq)</sub>               | SeO <sub>4</sub> <sup>2-</sup>               | -17.1             | -21.5             | +4.4                                |
| Na <sub>2</sub> O <sub>(s)</sub>                             | Na <sub>2</sub> O <sub>2</sub>               | -17.3             | -23.1             | +5.8                                |
| S <sub>2</sub> O <sub>3</sub> <sup>2-</sup> <sub>(aq)</sub>  | S <sub>2</sub> O <sub>4</sub> <sup>2-</sup>  | -18.7             | -24.3             | +5.6                                |
| NO <sub>2</sub> <sup>-</sup> <sub>(aq)</sub>                 | NO <sub>3</sub> <sup>-</sup>                 | -18.9             | -24.0             | +5.1                                |
| NaNO <sub>2</sub> <sub>(s)</sub>                             | NaNO <sub>3</sub>                            | -19.7             | -26.1             | +6.4                                |
| V <sub>2</sub> O <sub>4</sub> <sub>(s)</sub>                 | V <sub>2</sub> O <sub>5</sub>                | -24.2             | -29.5             | +5.3                                |
| MnO <sub>(s)</sub>                                           | MnO <sub>2</sub>                             | -24.4             | -32.2             | +7.8                                |
| Me <sub>2</sub> S <sub>(l)</sub>                             | Me <sub>2</sub> SO                           | -25.1             | -33.0             | +7.9                                |
| ReO <sub>2</sub> <sub>(s)</sub>                              | ReO <sub>3</sub>                             | -27               | -34               | +7                                  |
| MoO <sub>2</sub> <sub>(s)</sub>                              | MoO <sub>3</sub>                             | -32.3             | -37.3             | +5.0                                |
| MoBr <sub>3</sub> <sub>(s)</sub>                             | MoOBr <sub>3</sub>                           | -39               | -49               | +10                                 |
| H <sub>2</sub> AsO <sub>3</sub> <sup>-</sup> <sub>(aq)</sub> | H <sub>2</sub> AsO <sub>4</sub> <sup>-</sup> | -39.7             | -46.6             | +6.9                                |
| V <sub>2</sub> O <sub>3</sub> <sub>(s)</sub>                 | V <sub>2</sub> O <sub>4</sub>                | -42.8             | -49.8             | +7.0                                |
| HSO <sub>3</sub> <sup>-</sup> <sub>(aq)</sub>                | HSO <sub>4</sub> <sup>-</sup>                | -54.5             | -62.4             | +7.9                                |
| WO <sub>2</sub> <sub>(s)</sub>                               | WO <sub>3</sub>                              | -55.0             | -60.5             | +5.5                                |
| HCO <sub>2</sub> <sup>-</sup> <sub>(aq)</sub>                | HCO <sub>3</sub> <sup>-</sup>                | -56.3             | -63.7             | +7.4                                |
| Na <sub>2</sub> SO <sub>3</sub> <sub>(s)</sub>               | Na <sub>2</sub> SO <sub>4</sub>              | -61.6             | -68.4             | +6.8                                |
| SO <sub>3</sub> <sup>2-</sup> <sub>(aq)</sub>                | SO <sub>4</sub> <sup>2-</sup>                | -61.7             | -65.4             | +3.7                                |
| GeO <sub>(s)</sub>                                           | GeO <sub>2</sub>                             | -62.1             | -69.1             | +7.0                                |
| MeCHO <sub>(l)</sub>                                         | MeCO <sub>2</sub> H                          | -62.4             | -69.8             | +7.4                                |
| SnO <sub>(s)</sub>                                           | SnO <sub>2</sub>                             | -62.8             | -70.5             | +7.7                                |
| CN <sup>-</sup> <sub>(aq)</sub>                              | OCN <sup>-</sup>                             | -64.5             | -70.9             | +6.4                                |
| GaCl <sub>3</sub> •PCl <sub>3</sub> <sub>(s)</sub>           | GaCl <sub>3</sub> •POCl <sub>3</sub>         | -65               | -71               | +6                                  |
| UCl <sub>3</sub> <sub>(s)</sub>                              | UOCl <sub>3</sub>                            | -65.0             | -70.9             | +5.9                                |
| NaH <sub>(s)</sub>                                           | NaOH                                         | -82.7             | -88.3             | +5.6                                |

<sup>a</sup> All data from reference 8. <sup>b</sup> All energies in kcal mol<sup>-1</sup>.

For gas-phase and solution reactions, we prefer to use BDEs and BDFEs rather than heats of oxygenation. The differences between the  $\Delta H_{Y/YO}$  and the BDE, or the  $\Delta G_{Y/YO}$  and the BDFE, are the enthalpy or free energy of formation of O in the gas or solution phase (eq S12, 13). In some cases, Holm and Donahue tabulated  $\Delta H_{Y/YO}$  and/or  $\Delta G_{Y/YO}$  for the pure liquid or solid Y and YO. These cannot simply be converted to a BDE or BDFE because there is no simple definition of O in the pure liquid or solid phase.

|                                                           |                                                                                                                               |         |
|-----------------------------------------------------------|-------------------------------------------------------------------------------------------------------------------------------|---------|
| $Y-O_{(g/aq)} \rightleftharpoons Y_{(g/aq)} + O_{(g/aq)}$ | $BDE[Y-O] = -\Delta H_{Y/YO} + \Delta_f H^\circ(O_{(g/aq)})$<br>$BDFE[Y-O] = -\Delta G_{Y/YO} + \Delta_f G^\circ(O_{(g/aq)})$ | eq. S12 |
| $\frac{1}{2} O_{2(g)} \rightleftharpoons O_{(g)}$         | $\Delta_f H^\circ(O_{(g)}) = 59.6 \text{ kcal mol}^{-1(8)}$<br>$\Delta_f G^\circ(O_{(g)}) = 55.4 \text{ kcal mol}^{-1(8)}$    | eq. S13 |

We note that all energy values in this section are given in kcal mol<sup>-1</sup>, so that unit will be omitted in most cases below.

The free energy of solvation O atom from the gas phase to an aqueous solution is estimated using equations S14-18. Therefore, the  $\Delta_f G^\circ(O_{(aq)}) = \Delta_f G^\circ(O_{(g)}) + \Delta G^\circ_{O,solvation} \cong 61.7 \text{ kcal mol}^{-1}$ .

|                                                               |                                                                                |         |
|---------------------------------------------------------------|--------------------------------------------------------------------------------|---------|
| $O_{(g)} + 2 H^\bullet_{(g)} \rightleftharpoons H_2O_{(g)}$   | $-\Delta G^\circ_{H_2O(g),atomization} = -205.2$ <sup>(9)</sup>                | eq. S14 |
| $2 H^\bullet_{(aq)} \rightleftharpoons 2 H^\bullet_{(g)}$     | $-2\Delta G^\circ_{H^\bullet,solvation} = 2*(48.6-52.8) = -8.4$ <sup>(9)</sup> | eq. S15 |
| $H_2O_{(l)} \rightleftharpoons O_{(aq)} + 2 H^\bullet_{(aq)}$ | $\Delta G^\circ_{H_2O(l),atomization} = 217.8$ <sup>(9)</sup>                  | eq. S16 |
| $H_2O_{(g)} \rightleftharpoons H_2O_{(l)}$                    | $\Delta G^\circ_{H_2O,solvation} = -54.6 - (-56.7) = 2.1$ <sup>(10)</sup>      | eq. S17 |
| $O_{(g)} \rightleftharpoons O_{(aq)}$                         | $\Delta G^\circ_{O,solvation} \cong 6.3 \text{ kcal mol}^{-1}$                 | eq. S18 |

This analysis provides the BDFE(Y-O) in gas or aqueous media from the  $-\Delta G_{Y/YO}$  in that medium (eqs. S19 and S20).

$$Y-O_{(g)} \rightleftharpoons Y_{(g)} + O_{(g)} \quad BDFE[Y-O_{(g)}] = -\Delta G_{Y/YO(g)} + 55.4 \quad \text{eq. S19}$$

$$Y-O_{(aq)} \rightleftharpoons Y_{(aq)} + O_{(aq)} \quad BDFE[Y-O_{(aq)}] = -\Delta G_{Y/YO(aq)} + 61.7 \quad \text{eq. S20}$$

For many OAT couples, the  $\Delta H_{Y/YO}$  has been reported but not the  $\Delta G_{Y/YO}$ . For any reaction (at constant T and P),  $\Delta G = \Delta H - T\Delta S$ . With the rough assumption that the  $\Delta S^\circ$  values for Y and YO are the same, the difference between the  $\Delta G^\circ$  and the  $\Delta H^\circ$  is  $-T\Delta S^\circ(O)$ . For O<sub>(g)</sub>,  $T\Delta S^\circ = 298.15 \text{ K} \cdot [38.4940 \pm 0.0007 \text{ (cal/mol}\cdot\text{K)}]^{10,11} = 11.5 \text{ kcal mol}^{-1}$ . Then:

$$Y-O_{(g)} \rightleftharpoons Y_{(g)} + O_{(g)} \quad BDFE[Y-O_{(g)}] \cong BDE[Y-O_{(g)}] - 11.5 \quad \text{eq. S21}$$

To derive BDFEs from BDEs in solution requires the entropy of solvation of O atom, which can be roughly estimated with the value for an Ar atom:  $-T\Delta S^\circ(\text{Ar}) = -298.15 \text{ K} \cdot (-0.022881) = 6.8 \text{ kcal mol}^{-1}$ .<sup>10</sup> This gives:

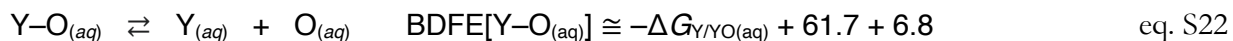

Another way to estimate the typical BDE/BDFE difference for condensed-phase YO species is to compare known values. Table S1 lists 41 examples,<sup>8</sup> and the calculated an average [ $\Delta G_{Y/YO} - \Delta H_{Y/YO}$ ] difference of  $6.5 \pm 2.1$  kcal mol<sup>-1</sup> (eq. S23), in good agreement with the above approximation that the entropy term contributes little to the calculated BDFE.

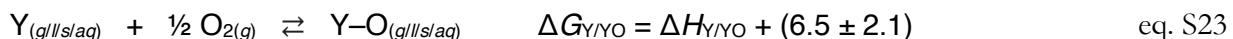

The BDFE of a Y–O reagent, with a known  $\Delta H_{Y/YO}$  value and an unknown  $\Delta G_{Y/YO}$ , can then be estimated (eq. S24).

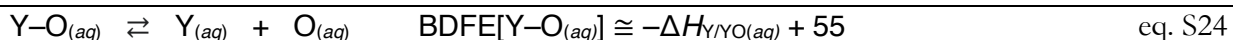

The solution BDFEs of the Y–O substrates used in this study were calculated using eq. S23 or S24, and are listed in Table S2. For substrates with both known  $\Delta G_{Y/YO}$  and  $\Delta H_{Y/YO}$  values,  $\Delta G_{Y/YO}$  and eq. S23 were used to calculate the BDFE[Y–O].

**Table S2.** Tabulation of the Y–O substrates used in this study and their thermochemical values.<sup>a</sup>

| Y                             | YO                            | $\Delta G_{Y/YO}$ | $\Delta H_{Y/YO}$ | BDFE[Y–O]<br>calc'd from<br>$\Delta G_{Y/YO(g)}$ | BDFE[Y–O]<br>calc'd from<br>$\Delta H_{Y/YO}$ | IrO <sub>x</sub> + Y<br>reaction<br>direction | Refer-<br>ence |
|-------------------------------|-------------------------------|-------------------|-------------------|--------------------------------------------------|-----------------------------------------------|-----------------------------------------------|----------------|
| HSO <sub>4</sub> <sup>-</sup> | HSO <sub>5</sub> <sup>-</sup> | n.d.              | n.d.              | n.d.                                             | n.d.                                          | ←                                             |                |
| IO <sub>3</sub> <sup>-</sup>  | IO <sub>4</sub> <sup>-</sup>  | +16.6             | +16.7             | 45.1                                             | 38.5 ± 2.1                                    | ←                                             | 8              |
| Cl <sup>-</sup>               | ClO <sup>-</sup>              | +22.6             | +14.4             | 39.1                                             | 40.4 ± 2.1                                    | ←                                             | 8              |
| Py                            | pyO                           | n.d.              | -3.8              | n.d.                                             | 59.0 ± 2.1                                    | nr                                            | 12             |
| 4-CN-py                       | 4-CN-pyO                      | n.d.              | -3.9              | n.d.                                             | 59.1 ± 2.1                                    | nr                                            | 12             |
| BuONO <sup>b</sup>            | BuONO <sub>2</sub>            | n.d.              | -14.7             | n.d.                                             | 69.9 ± 2.1                                    | nr                                            | 8              |
| NO <sub>2</sub> <sup>-</sup>  | NO <sub>3</sub> <sup>-</sup>  | -18.9             | -24.0             | 80.6                                             | 79.2 ± 2.1                                    | →                                             | 8              |
| Met <sup>c</sup>              | MetO                          | -25.1             | -33.0             | 86.8                                             | 88.2 ± 2.1                                    | →                                             | 8              |
| MetO <sup>d</sup>             | MetO <sub>2</sub>             | -45.7             | -52.7             | 107.4                                            | 107.9 ± 2.1                                   | →                                             | 8              |
| PAr <sub>3</sub> <sup>e</sup> | OPAr <sub>3</sub>             | n.d.              | -69.9             | n.d.                                             | 125.1 ± 2.1                                   | →                                             | 8              |

<sup>a</sup> BDFE values in kcal mol<sup>-1</sup>. All materials in aqueous solution. n.d. = Not determined. <sup>b</sup> Assumed to be the same as EtONO<sub>2</sub>. <sup>c</sup> Assumed to be the same as Me<sub>2</sub>S(O). <sup>d</sup> Assumed to be the same as Me<sub>2</sub>SO<sub>2</sub>. <sup>e</sup> Assumed to be the same as OPPh<sub>3</sub>. For reaction IrO<sub>x</sub> + Y, the symbol → indicates that the reaction proceeds left to right forming the reduced-IrO<sub>x</sub> and YO product. “nr” indicates that no reaction was observed. The symbol ← indicates that the reaction proceeds right to left: reduced-IrO<sub>x</sub> + YO forms Y + oxidized-IrO<sub>x</sub>.

## Section S8: References

- (1) Zhao, Y.; Hernandez-Pagan, E. A.; Vargas-Barbosa, N. M.; Dysart, J. L.; Mallouk, T. E. A High Yield Synthesis of Ligand-Free Iridium Oxide Nanoparticles with High Electrocatalytic Activity. *Journal of Physical Chemistry Letters* **2011**, *2* (5), 402–406. <https://doi.org/10.1021/jz200051c>.
- (2) Lee, J. L.; Gentry, N. E.; Peper, J. L.; Hetzel, S.; Quist, C.; Menges, F. S.; Mayer, J. M. Oxygen Atom Transfer Reactions of Colloidal Metal Oxide Nanoparticles. *ACS Nano* **2025**, *19* (10), 10289–10300. <https://doi.org/10.1021/acsnano.4c17955>.
- (3) Rogers, D. B.; Shannon, R. D.; Sleight, A. W.; Gillson, J. L. Crystal Chemistry of Metal Dioxides with Rutile-Related Structures. *Inorganic Chemistry* **1969**, *8* (4), 841–849. <https://doi.org/10.1021/ic50074a029>.
- (4) Creutz, C. Complexities of Ascorbate as a Reducing Agent. *Inorg. Chem.* **1981**, *20* (12), 4449–4452. <https://doi.org/10.1021/ic50226a088>.
- (5) Kerber, R. C. “As Simple as Possible, but Not Simpler”—The Case of Dehydroascorbic Acid. *J. Chem. Educ.* **2008**, *85* (9), 1237–1242. <https://doi.org/10.1021/ed085p1237>.
- (6) Njus, D.; Kelley, P. M.; Tu, Y.-J.; Schlegel, H. B. Ascorbic Acid: The Chemistry Underlying Its Antioxidant Properties. *Free Radical Biology and Medicine* **2020**, *159*, 37–43. <https://doi.org/10.1016/j.freeradbiomed.2020.07.013>.
- (7) Yost, D. M.; Russell, Jr., H. Nitrogen and Its Oxides and Sulfides. In *Systematic inorganic chemistry of the fifth-and-sixth-group nonmetallic elements*; New York, Prentice-Hall, Inc., 1946; pp 1–40.
- (8) Holm, R. H.; Donahue, J. P. A Thermodynamic Scale for Oxygen Atom Transfer Reactions. *Polyhedron* **1993**, *12* (6), 571–589. [https://doi.org/10.1016/S0277-5387\(00\)84972-4](https://doi.org/10.1016/S0277-5387(00)84972-4).
- (9) Agarwal, R. G.; Coste, S. C.; Groff, B. D.; Heuer, A. M.; Noh, H.; Parada, G. A.; Wise, C. F.; Nichols, E. M.; Warren, J. J.; Mayer, J. M. Free Energies of Proton-Coupled Electron Transfer Reagents and Their Applications. *Chemical Reviews* **2022**, *122* (1), 1–49. <https://doi.org/10.1021/acs.chemrev.1c00521>.
- (10) Wagman, D. D.; Evans, W. H.; Parker, V. B.; Schumm, R. H.; Halow, I.; Bailey, S. M.; Churney, K. L.; Nuttall, R. L. The NBS Tables of Chemical Thermodynamic Properties: Selected Values for Inorganic and C<sub>1</sub> and C<sub>2</sub> Organic Substances in SI Units. *Journal of Physical and Chemical Reference Data* **1982**, *11* (2).
- (11) Linstrom, Eds. P. J.; Mallard, W. G. NIST Chemistry WebBook, NIST Standard Reference Database 69, 1997. <https://doi.org/10.18434/T4D303>.
- (12) Ribeiro Da Silva, M. D. M. C.; Agostinha, M.; Matos, R.; Vaz, M. C.; Santos, L. M. N. B. F.; Pilcher, G.; Acree Jr., W. E.; Powell, J. R. Enthalpies of Combustion of the Pyridine N-Oxide Derivatives: 4-Methyl-, 3-Cyano-, 4-Cyano-, 3-Hydroxy-, 2-Carboxy-, 4-Carboxy-, and 3-Methyl-4-Nitro, and of the Pyridine Derivatives: 2-Carboxy-, and 4-Carboxy-. The Dissociation Enthalpies of the N-O Bonds. *The Journal of Chemical Thermodynamics* **1998**, *30* (7), 869–878. <https://doi.org/10.1006/jcht.1998.0353>.
